# Supplementary material for: Catalytic asymmetric synthesis of cyclic amino acids and alkaloid derivatives: application to (+)-dihydropinidine and Selfotel synthesis
Source: Royal Society of Chemistry journal article supplement (doi:10.1039/c0sc00250j), 2010-01-01

## Supporting Information

### Catalytic asymmetric synthesis of cyclic amino acids and alkaloid derivatives: Application to (+)-dihydropinidine and Selfotel synthesis

Taichi Kano, Takeshi Kumano, Ryu Sakamoto and Keiji Maruoka\*

*Department of Chemistry, Graduate School of Science, Kyoto University  
Sakyo, Kyoto 606-8502, Japan*

**General Information:** Infrared (IR) spectra were recorded on a Shimadzu IRPrestige-21 spectrometer. <sup>1</sup>H NMR spectra were measured on a JEOL JNM-FX400 (400MHz) spectrometer. Chemical shifts were reported in ppm from tetramethylsilane (in the case of CDCl<sub>3</sub>) as an internal standard. Data were reported as follows: chemical shift, integration, multiplicity (s = singlet, d = doublet, t = triplet, q = quintet, m = multiplet, br = broad, and app = apparent), and coupling constants (Hz). <sup>13</sup>C NMR spectra were recorded on a JEOL JNM-FX400 (100MHz) spectrometer with complete proton decoupling. Chemical shifts were reported in ppm from the residual solvent as an internal standard. High performance liquid chromatography (HPLC) was performed on Shimadzu 10A instruments using a Daicel CHIRALPAK AD-H, AS-H and CHIRALCEL OD-H 4.6 mm × 25 cm column. The high-resolution mass spectra (HRMS) were performed on Applied Biosystems Mariner 8295 API-TOF and Bruker microTOF. Optical rotations were measured on a JASCO DIP-1000 digital polarimeter. For thin layer chromatography (TLC) analysis throughout this work, Merck precoated TLC plates (silica gel 60 GF<sub>254</sub>, 0.25 mm) were used. The products were purified by flash column chromatography on silica gel 60 (Merck 1.09386.9025, 230-400 mesh). Glycine *t*-butyl ester-benzophenoneimine Schiff base **1**,<sup>1</sup> alanine *t*-butyl ester-*p*-chlorobenzaldimine Schiff base **6**,<sup>2</sup> chiral phase transfer catalysts (*S*)-**2a**, (*S*)-**2b** and (*S*)-**2c** were prepared according to literature procedure.<sup>3</sup> Alkyl halides **3**,<sup>4-6</sup> **8**<sup>4</sup> and **13**<sup>7</sup> were prepared according to literature procedure. Cyclic amino esters **5a**,<sup>8</sup> **12b**<sup>9</sup> and **12c**<sup>9</sup> are known compounds. Selfotel (CGS-19755) was prepared by a similar method described in literature.<sup>10</sup> Other simple chemicals were purchased and used as such.

#### General Procedure for Asymmetric Alkylation under Phase-Transfer Conditions

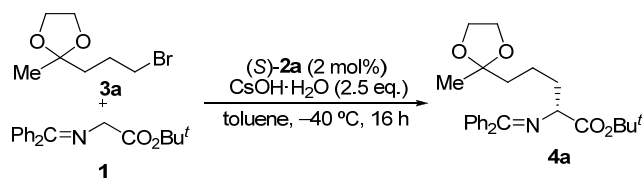

To a mixture of **1** (30 mg, 0.10 mmol), **3a** (209 mg, 1.0 mmol) and (*S*)-**2a** (1.5 mg, 0.002 mmol) in toluene (1 mL) was added CsOH (42 mg, 0.25 mmol) at -40 °C, and the reaction mixture was vigorously stirred for 16 h. After the consumption of the starting material, the mixture was diluted with H<sub>2</sub>O, extracted with dichloromethane. The organic layer was dried over Na<sub>2</sub>SO<sub>4</sub> and purified by chromatography on silica gel (hexane/ethyl acetate = 5/1 as eluent) to afford **4a** (36 mg, 0.085 mmol, 85% yield) as an oil. The

enantiomeric excess was determined by HPLC analysis (Daicel Chiralpak AD-H, hexane/2-propanol = 50/1, flow rate 1.0 mL/min,  $\lambda = 254$  nm, retention time: 6.3 min (major) and 10.0 min (minor)).  $[\alpha]_{\text{D}}^{25} = 81.1$  (*c* 1.0, CHCl<sub>3</sub>; 99% ee); <sup>1</sup>H NMR  $\delta$  1.27 (3H, s), 1.30-1.40 (2H, m), 1.44 (9H, s), 1.55-1.60 (2H, m), 1.87-1.93 (2H, m), 3.84-3.93 (5H, m), 7.17-7.19 (2H, m), 7.29-7.45 (6H, m), 7.63-7.66 (2H, m); <sup>13</sup>C NMR  $\delta$  20.6, 23.8, 28.1, 33.8, 38.9, 64.6, 66.0, 80.8, 110.0, 127.88, 127.94, 128.4, 128.5, 128.8, 130.1, 136.7, 139.7, 169.9, 171.5; IR (neat) 1069, 1148, 1368, 1447, 1622, 1732, 2951 cm<sup>-1</sup>; HRMS (ESI-TOF) Calcd. for C<sub>26</sub>H<sub>34</sub>NO<sub>4</sub>: 424.2482 ([M + H]<sup>+</sup>), Found: 424.2491 ([M + H]<sup>+</sup>).

#### (*R*)-*tert*-Butyl 2-(Diphenylmethyleneamino)-6-(2-methyl-1,3-dioxolan-2-yl)hexanoate **4b**

Daicel Chiralpak AD-H, hexane/2-propanol = 50/1, flow rate 0.5 mL/min,  $\lambda = 254$  nm, retention time: 12.0 min (major) and 15.7 min (minor).  $[\alpha]_{\text{D}}^{20} = 83.6$  (*c* 0.5, CHCl<sub>3</sub>; 98% ee); <sup>1</sup>H NMR  $\delta$  1.20-1.37 (7H, m), 1.44 (9H, s), 1.57-1.61 (2H, m), 1.88 (2H, q, *J* = 7.6 Hz), 3.85-3.94 (5H, m), 7.15-7.18 (2H, m), 7.30-7.56 (6H, m), 7.63-7.65 (2H, m); <sup>13</sup>C NMR  $\delta$  23.7, 23.9, 26.3, 28.1, 33.6, 34.7, 39.1, 64.6, 66.0, 80.8, 110.0, 127.9, 128.0, 128.37, 128.42, 128.8, 130.1, 135.3, 136.8, 169.8, 171.6; IR (neat) 1152, 1368, 1622, 1732, 2359, 2978 cm<sup>-1</sup>; HRMS (ESI-TOF) Calcd. for C<sub>27</sub>H<sub>36</sub>NO<sub>4</sub>: 438.2639 ([M + H]<sup>+</sup>), Found: 438.2646 ([M + H]<sup>+</sup>).

#### General Procedure for Diastereoselective Reductive Amination

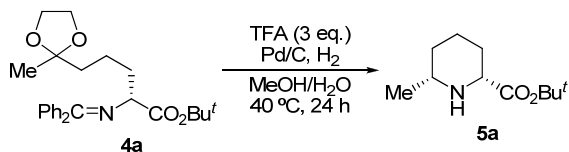

To a mixture of **4a** (67 mg, 0.16 mmol), MeOH (3 mL) and H<sub>2</sub>O (1.5 mL) was added TFA (36  $\mu$ L, 0.48 mmol). After stirring for 1 h, to the mixture was added 10% Pd/C (34 mg) and the mixture was stirred at 40 °C for 24 h under hydrogen atmosphere. After filtration through celite, the filtrate was basified with aqueous NaHCO<sub>3</sub> and extracted with dichloromethane. The organic layer was dried over Na<sub>2</sub>SO<sub>4</sub> and purified by chromatography on silica gel (dichloromethane/methanol = 50/1 as eluent) to afford **5a** (28 mg, 0.14 mmol 88% yield) as an oil.  $[\alpha]_{\text{D}}^{21} = 7.1$  (*c* 0.7, CHCl<sub>3</sub>; 99% ee); <sup>1</sup>H NMR  $\delta$  0.98-1.08 (1H, m), 1.12 (3H, d, *J* = 6.4 Hz), 1.25-1.44 (2H, m), 1.46 (9H, s), 1.57-1.62 (1H, m), 1.77 (1H, br), 1.83-1.89 (1H, m), 1.94-1.99 (1H, m), 2.64 (1H, dqd, *J* = 11.0, 6.4, 2.7 Hz), 3.22 (1H, dd, *J* = 11.5, 2.7 Hz); <sup>13</sup>C NMR  $\delta$  22.8, 24.6, 28.0, 29.0, 33.8, 51.8, 59.8, 80.8, 172.6; IR (neat) 1153, 1368, 1730, 2357, 2930 cm<sup>-1</sup>; HRMS (ESI-TOF) Calcd. for C<sub>11</sub>H<sub>22</sub>NO<sub>2</sub>: 200.1645 ([M + H]<sup>+</sup>), Found: 200.1644 ([M + H]<sup>+</sup>).

#### (*2R,7R*)-*tert*-Butyl 7-Methylazepane-2-carboxylate **5b**

$[\alpha]_{\text{D}}^{22} = 15.0$  (*c* 0.5, CHCl<sub>3</sub>; 98% ee); <sup>1</sup>H NMR  $\delta$  1.12 (3H, d, *J* = 6.6 Hz), 1.26-1.34 (1H, m), 1.40-1.44 (1H, m), 1.46 (9H, s), 1.61-1.76 (5H, m), 1.88 (1H, br), 1.98-2.07 (1H, m), 2.71-2.79 (1H, m), 3.39 (1H, dd, *J* = 9.8, 5.1 Hz); <sup>13</sup>C NMR  $\delta$  23.9, 25.0, 25.3, 28.0, 33.6, 39.6, 54.5, 61.0, 80.9, 174.1; IR (neat) 1157, 1368, 1726, 2359, 2926 cm<sup>-1</sup>; HRMS (ESI-TOF) Calcd. for C<sub>12</sub>H<sub>24</sub>NO<sub>2</sub>: 214.1802 ([M + H]<sup>+</sup>), Found: 214.1799 ([M + H]<sup>+</sup>).

### Synthesis of (2*R*,6*R*)-*tert*-Butyl 2,6-Dimethylpiperidine-2-carboxylate **7**

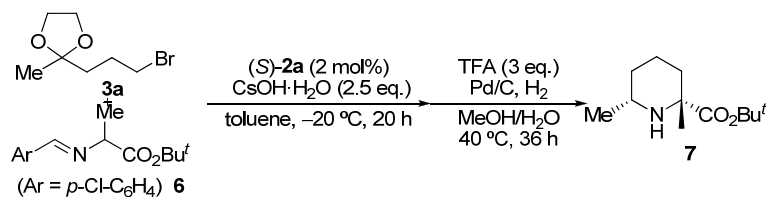

To a mixture of **8** (161 mg, 0.60 mmol), **3a** (254 mg, 6.0 mmol) and (S)-**2a** (9 mg, 0.012 mmol) in toluene (6 mL) was added CsOH (280 mg, 1.5 mmol) at -20 °C, and the reaction mixture was vigorously stirred for 20 h. After the consumption of the starting material, the mixture was concentrated under reduced pressure, and to the residue were added EtOH (3mL), H<sub>2</sub>O (3mL), and TFA (245 μL, 3.3 mmol). After stirring for 1 h, to the mixture was added 10% Pd/C (80 mg) and the mixture was stirred at 40 °C for 36 h under hydrogen atmosphere. After filtration through celite, the result solution was basified with aqueous NaHCO<sub>3</sub> and extracted with dichloromethane. The organic layer was dried over Na<sub>2</sub>SO<sub>4</sub> and purified by chromatography on silica gel (dichloromethane/methanol = 30/1 as eluent) to afford **7** (79 mg, 0.37 mmol, 61% yield) as an oil.  $[\alpha]_D^{21} = 18.3$  (*c* 1.0, CHCl<sub>3</sub>; 96% ee); <sup>1</sup>H NMR δ 0.91-1.02 (1H, m), 1.07 (3H, d, *J* = 6.4 Hz), 1.35 (3H, s), 1.46 (9H, s), 1.49-1.73 (6H, m), 2.86-2.91 (1H, m); <sup>13</sup>C NMR δ 20.1, 20.6, 22.9, 27.8, 32.8, 34.0, 45.5, 58.1, 80.4, 175.7; IR (neat) 1145, 1284, 1368, 1454, 1724, 2932 cm<sup>-1</sup>; HRMS (ESI-TOF) Calcd. for C<sub>12</sub>H<sub>24</sub>NO<sub>2</sub>: 214.1802 ([M + H]<sup>+</sup>), Found: 214.1794 ([M + H]<sup>+</sup>).

### Determination of the Enantiomeric Excess of (R)-*tert*-Butyl 2-Amino-2-methyl-5-(2-methyl-1,3-dioxolan-2-yl)pentanoate

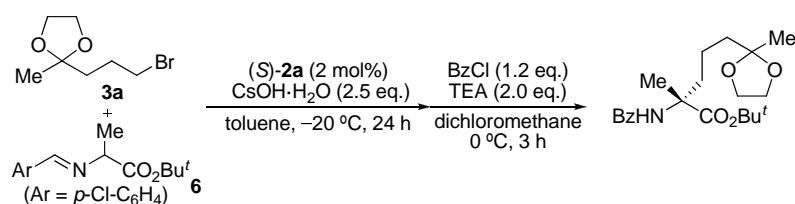

To a mixture of **6** (54 mg, 0.20 mmol), **3a** (418 mg, 2.0 mmol) and (S)-**2a** (3 mg, 0.004 mmol) in toluene (2 mL) was added CsOH (93 mg, 0.50 mmol) at -20 °C, and the reaction mixture was vigorously stirred for 24 h. After the consumption of the starting material, the mixture was concentrated under reduced pressure, and to the residue were added MeOH (1mL), H<sub>2</sub>O (1mL), and TFA (53 μL, 0.7 mmol). After stirring for 0.5 h, the solution was basified with aqueous NaHCO<sub>3</sub>, extracted with dichloromethane, dried over Na<sub>2</sub>SO<sub>4</sub> and concentrated. To a solution of the residue and triethylamine (56 μL, 0.40 mmol) in dichloromethane (2 mL) was added benzoyl chloride (34 μL, 0.24 mmol) at 0 °C. After stirring for 3 h at 0 °C, the mixture was quenched with H<sub>2</sub>O and extracted with dichloromethane. The organic layer was dried over Na<sub>2</sub>SO<sub>4</sub> and purified by chromatography on silica gel (hexane/ethylacetate = 5/1 as eluent) to afford *N*-benzoylated

derivative of the title compound (41 mg, 0.11 mmol, 51% yield) as an oil. The enantiomeric excess was determined by HPLC analysis (Daicel Chiralpak OD-H, hexane/2-propanol = 50/1, flow rate 0.5 mL/min,  $\lambda$  = 254 nm, retention time: 19.2 min (major) and 30.2 min (minor)).  $[\alpha]_D^{19} = -12.6$  ( $c$  0.9,  $\text{CHCl}_3$ ; 96% ee);  $^1\text{H}$  NMR  $\delta$  1.26 (3H, s), 1.38-1.48 (2H, m), 1.51 (9H, s), 1.55-1.69 (2H, m), 1.71 (3H, s), 1.78-1.86 (1H, m), 2.52-2.60 (1H, m), 3.83-3.92 (4H, m), 7.41-7.51 (3H, m), 7.78-7.81 (2H, m);  $^{13}\text{C}$  NMR  $\delta$  19.1, 23.4, 23.7, 27.9, 36.0, 38.8, 61.2, 64.5, 64.6, 82.3, 109.8, 126.8, 128.5, 131.3, 135.2, 166.0, 174.2; IR (neat) 1152, 1663, 1728, 2980, 3408  $\text{cm}^{-1}$ ; HRMS (ESI-TOF) Calcd. for  $\text{C}_{21}\text{H}_{32}\text{NO}_5$ : 378.2275 ( $[\text{M} + \text{H}]^+$ ), Found: 378.2271 ( $[\text{M} + \text{H}]^+$ ).

### Asymmetric Synthesis of (+)-Dihydropinidine Hydrochloride

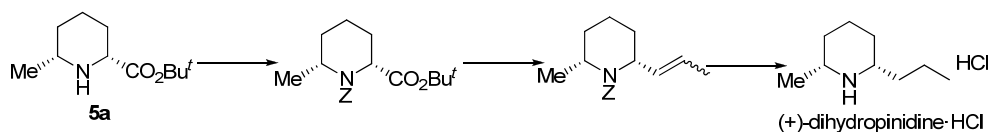

To a solution of **5a** (123 mg, 0.64 mmol) in dioxane (2 mL) and  $\text{H}_2\text{O}$  (2 mL) were added  $\text{NaHCO}_3$  (59 mg, 0.70 mmol) and Benzyl Chloroformate (101  $\mu\text{L}$ , 0.70 mmol) at 0  $^\circ\text{C}$ . The resulting solution was stirred at room temperature overnight. The reaction mixture was evaporated to remove dioxane, extracted with dichloromethane and washed with 1 N HCl and  $\text{H}_2\text{O}$ . The organic layer was dried over  $\text{Na}_2\text{SO}_4$  and purified by chromatography on silica gel (hexane/ethyl acetate = 5/1 as eluent) to afford the (2*R*,6*R*)-1-benzyl 2-*tert*-butyl 6-methylpiperidine-1,2-dicarboxylate (193 mg, 91% yield). The enantiomeric excess was determined by HPLC analysis (Daicel Chiralpak AD-H, hexane/2-propanol = 50/1, flow rate 0.5 mL/min,  $\lambda$  = 254 nm, retention time: 22.1 min (minor) and 24.0 min (major)).  $[\alpha]_D^{27} = 36.2$  ( $c$  1.0,  $\text{CHCl}_3$ , 99% ee);  $^1\text{H}$  NMR  $\delta$  1.18 (3H, d,  $J$  = 7.1 Hz), 1.41 (9H, s), 1.47-1.71 (5H, m), 2.28 (1H, d,  $J$  = 6.6 Hz), 4.38-4.44 (1H, m), 4.73 (1H, br), 5.16 (2H, s), 7.26-7.36 (5H, m);  $^{13}\text{C}$  NMR  $\delta$  15.5, 18.7, 25.8, 27.8, 30.0, 46.7, 53.3, 67.0, 81.2, 127.78, 127.81, 128.4, 136.8, 156.1, 171.6; IR (neat) 1074, 1153, 1406, 1740, 2357  $\text{cm}^{-1}$ ; HRMS (ESI-TOF) Calcd. for  $\text{C}_{19}\text{H}_{27}\text{NNaO}_4$ : 356.1832 ( $[\text{M} + \text{Na}]^+$ ), Found: 356.1827 ( $[\text{M} + \text{Na}]^+$ ).

To a solution of (2*R*,6*R*)-1-benzyl 2-*tert*-butyl 6-methylpiperidine-1,2-dicarboxylate (181 mg, 0.54 mmol) in toluene (9 mL) was added DIBAL-H (0.43 mL, 1.5 M in toluene) in a dropwise fashion at  $-78$   $^\circ\text{C}$ . After being stirred at the same temperature for 2 h, ethyl acetate (1 mL) was added dropwise. After stirring for 30 min, a few drops of  $\text{H}_2\text{O}$  were then added. The resulting mixture was then warmed to room temperature and stirred vigorously for 1 h. The mixture was filtered through celite with dichloromethane as eluent. The filtrate was concentrated to afford crude aldehyde, which was used for the next reaction without further purification.

To a flask charged with  $\text{Ph}_3\text{PCH}_2\text{CH}_3\text{Br}$  (301 mg, 0.81 mmol) in THF (8 mL) was added *n*-BuLi (0.50 mL, 1.6 M in hexane) at  $-78$   $^\circ\text{C}$ . After being stirred for 1 h at room temperature, the crude aldehyde obtained above in THF (1 mL) was added at  $-78$   $^\circ\text{C}$ . The resulting mixture was stirred overnight at room temperature. The reaction mixture was quenched with 1 N HCl, extracted with dichloromethane, dried over  $\text{Na}_2\text{SO}_4$  and purified by chromatography on silica gel (hexane/ethyl acetate = 20/1 as eluent) to afford E:Z mixture of (2*R*,6*R*)-benzyl 2-methyl-6-(prop-1-enyl)piperidine-1-carboxylate (81 mg, 55% yield, E (98% ee)/Z (95%

ee) = 1/5). The enantiomeric excess was determined by HPLC analysis (Daicel Chiralpak AD-H, hexane/2-propanol = 40/1, flow rate 0.5 mL/min,  $\lambda$  = 254 nm, retention time: 15.5 min (Z: minor), 16.3 min (Z: major), 18.0 min (E: major), 19.5 min (E: minor)).  $^1\text{H}$  NMR  $\delta$  1.17 (0.50H, d,  $J$  = 7.1 Hz), 1.24 (2.50H, d,  $J$  = 7.1 Hz), 1.45-1.50 (1H, m), 1.55-1.76 (8H, m), 4.40-4.44 (1H, m), 4.73 (0.17H, br), 5.03-5.07 (1H, m), 5.13 (1.67H, s), 5.14 (0.33H, d,  $J$  = 4.6 Hz), 5.44-5.48 (0.83H, m), 5.55-5.57 (0.17H, m), 5.72 (0.83H, ddq,  $J$  = 11.2, 9.5, 1.7 Hz), 7.28-7.36 (5H, m);  $^{13}\text{C}$  NMR  $\delta$  (E isomer / Z isomer) 14.3/14.5, 17.8/12.7, 20.5/20.9, 28.8/30.0, 30.2/30.4, 46.4/46.3, 51.4/47.6, 66.8/66.9, 125.9/125.2, 127.71/127.75, 127.73/127.8, 128.4/128.3, 132.5/131.7, 137.2/137.1, 155.8/155.7; IR (neat) 1072, 1307, 1692, 2340, 2936  $\text{cm}^{-1}$ ; HRMS (ESI-TOF) Calcd. for  $\text{C}_{17}\text{H}_{24}\text{NO}_2$ : 274.1802 ( $[\text{M} + \text{H}]^+$ ), Found: 274.1800 ( $[\text{M} + \text{H}]^+$ ).

To a solution of (2*R*,6*R*)-benzyl 2-methyl-6-(prop-1-enyl)piperidine-1-carboxylate (45mg, 0.17 mmol) in MeOH (4 mL) was added 10% Pd/C (20 mg). The mixture was stirred under hydrogen atmosphere for 24 h at room temperature. The resulting mixture was filtered through celite with MeOH as eluent. To the filtrate was added HCl (3 mL, 1 M in MeOH) and the whole mixture was concentrated. The residue was recrystallized from ethyl acetate to yield (+)-dihydropinidine hydrochloride (20 mg, 67% yield):  $[\alpha]_{\text{D}}^{26}$  = 12.0 ( $c$  0.2, EtOH);  $^1\text{H}$  NMR ( $\text{CD}_3\text{OD}$ )  $\delta$  0.97 (3H, t,  $J$  = 4.0 Hz), 1.32-1.66 (10H, m), 1.87-1.93 (2H, m), 2.00 (1H, d,  $J$  = 12.0 Hz), 3.06 (1H, br), 3.18 (1H, br);  $^{13}\text{C}$  NMR  $\delta$  14.2, 19.5, 19.6, 23.5, 29.1, 31.7, 37.0, 55.0, 58.7; IR (neat) 1129, 1372, 1461, 2958  $\text{cm}^{-1}$ ; HRMS (ESI-TOF) Calcd. for  $\text{C}_9\text{H}_{20}\text{N}$ : 142.1590 ( $[\text{M} + \text{H}]^+$ ), Found: 142.1596 ( $[\text{M} + \text{H}]^+$ ).

#### Synthesis of 6-(2-Bromoethyl)-1,4-dioxaspiro[4.4]nonane 8b

The title compound was prepared by a similar method described in literature.<sup>4</sup>

$^1\text{H}$  NMR  $\delta$  1.31-1.36 (1H, m), 1.63-1.84 (5H, m), 1.91-1.95 (1H, m), 2.05-2.12 (2H, m), 3.35-3.40 (1H, m), 3.42-3.52 (1H, m), 3.87-3.95 (4H, m);  $^{13}\text{C}$  NMR  $\delta$  20.6, 28.9, 32.6, 32.8, 35.5, 44.6, 64.4, 64.5, 117.8; IR (neat) 1026, 1139, 1206, 1260, 1315, 1738, 2876, 2957  $\text{cm}^{-1}$ .

#### Synthesis of 6-(2-Bromoethyl)-1,4-dioxaspiro[4.5]decane 8c

The title compound was prepared by a similar method described in literature.<sup>4</sup>

$^1\text{H}$  NMR  $\delta$  1.25-1.39 (3H, m), 1.43-1.49 (1H, m), 1.59-1.72 (3H, m), 1.76-1.81 (3H, m), 2.15-2.28 (1H, m), 3.38-3.45 (1H, m), 3.49-3.55 (1H, m), 3.91-3.99 (4H, m);  $^{13}\text{C}$  NMR  $\delta$  23.6, 24.5, 29.1, 32.3, 32.9, 34.5, 43.2, 64.5, 64.7, 110.4; IR (neat) 1117, 1221, 1524, 1713, 2978, 3335  $\text{cm}^{-1}$ .

#### Diastereo-mixture of (2*R*)-*tert*-Butyl 2-(Diphenylmethyleneamino)-5-(2-methyl-1,3-dioxolan-2-yl)hexanoate 9a

(2*R*,5*R*)/(2*R*,5*S*) = 1/1.  $^1\text{H}$  NMR  $\delta$  0.91 (1.5H, d,  $J$  = 6.8 Hz), 0.93 (1.5H, d,  $J$  = 7.1 Hz), 0.99-1.11 (1H, m), 1.19 (3H, s), 1.44 (4.5H, s), 1.45 (4.5H, s), 1.51-1.65 (2H, m), 1.69-1.88 (1H, m), 1.97-2.10 (1H, m), 3.79-3.93 (5H, m), 7.16-7.19 (2H, m), 7.3-7.46 (6H, m), 7.63-7.65 (2H, m);  $^{13}\text{C}$  NMR  $\delta$  14.5, 14.6, 20.2, 20.3, 28.06, 28.12, 31.4, 31.8, 32.0, 32.1, 41.3, 41.4, 47.5, 47.6, 48.8, 48.9, 64.49, 65.54, 66.3, 66.6, 80.76, 80.81, 112.29, 112.34, 127.89, 127.90, 127.94, 128.35, 128.37, 128.43, 128.77, 128.82, 129.9, 130.1, 136.78, 136.82, 139.80, 139.83, 169.7, 169.9, 171.5, 171.6; IR (neat) 1150, 1368, 1732, 2976  $\text{cm}^{-1}$ ; HRMS

(ESI-TOF) Calcd. for  $C_{27}H_{36}NO_4$ : 438.2639 ( $[M + H]^+$ ), Found: 438.2622 ( $[M + H]^+$ ).

#### Diastereo-mixture of (2R,6R)-tert-Butyl 5,6-Dimethylpiperidine-2-carboxylate 12a

(2R,5R,6R)/(2R,5S,6R) = 2.5/1.  $^1H$  NMR (toluene-d<sub>8</sub>, 80 °C)  $\delta$  0.85 (0.86H, d,  $J$  = 6.1 Hz), 0.89 (2.14H, d,  $J$  = 7.1 Hz), 1.03 (2.14H, d,  $J$  = 6.6 Hz), 1.11 (0.86H, d,  $J$  = 6.4 Hz), 1.46 (9H, s), 1.47-1.71 (5.42H, m), 1.78-1.81 (0.29H, m), 1.95-2.00 (0.29H, m), 2.24 (0.29H, dq,  $J$  = 8.8, 6.4 Hz), 2.85 (0.71H, dq,  $J$  = 6.6, 2.9 Hz), 3.21-3.26 (1H, m);  $^{13}C$  NMR  $\delta$  (2R,5R,6R/2R,5S,6R) 10.9/18.4, 20.0/20.3, 23.6/29.9, 28.01/28.00, 31.5/32.0, 33.8/37.7, 57.9/53.6, 60.2/59.7, 80.7/80.6, 172.9/172.6; IR (neat) 1155, 1233, 1368, 1730, 2930  $cm^{-1}$ ; HRMS (ESI-TOF) Calcd. for  $C_{12}H_{24}NO_2$ : 214.1802 ( $[M + H]^+$ ), Found: 214.1807 ( $[M + H]^+$ ).

#### Determination of the Enantiomeric Excess of 12a

The enantiomeric excess of 12a was determined by HPLC analysis after conversion to the corresponding benzamide. (2R,5R,6R)/(2R,5S,6R) = 2.5 (99% ee)/1(99% ee). Daicel Chiralpak AS-H, hexane/2-propanol = 10/1, flow rate 1.0 mL/min,  $\lambda$  = 254 nm, retention time: (2R,5S,6R: 9.8 min (minor), 10.9 min (major)), (2R,5R,6R: 12.1 min (major), 20.7 min (minor)).  $^1H$  NMR (toluene-d<sub>8</sub>, 80 °C)  $\delta$  0.38 (2.14H, d,  $J$  = 6.6 Hz), 0.61 (0.86H, d,  $J$  = 7.1 Hz), 0.77-0.79 (0.29H, m), 0.81 (2.14H, d,  $J$  = 7.1 Hz), 0.93 (0.71H, m), 0.95 (0.86H, d,  $J$  = 7.6 Hz), 1.09-1.49 (11H, m), 1.55-1.64 (0.29H, m), 1.74-1.80 (0.29H, m), 1.85-1.88 (0.71H, m), 1.96 (0.71H, d,  $J$  = 13.2 Hz), 3.76-4.69 (2H, m), 6.82-6.90 (3H, m), 7.13-7.19 (2H, m);  $^{13}C$  NMR  $\delta$  (2R,5R,6R/2R,5S,6R) 15.6/23.1, 21.5/21.4, 27.3/26.1, 30.9/29.3, 36.17/36.15, 37.8/37.7, 56.1/55.1, 56.9/55.4, 84.0/83.8, 130.0/129.9, 131.2/131.9, 140.4/140.7, 141.4/141.5, 174.1/174.4, 174.8/175.5; IR (neat) 1155, 1412, 1641, 1726, 2361, 2976  $cm^{-1}$ ; HRMS (ESI-TOF) Calcd. for  $C_{19}H_{28}NO_3$ : 318.2064 ( $[M + H]^+$ ), Found: 318.2048 ( $[M + H]^+$ ).

#### Diastereo-mixture of (2R)-tert-Butyl 2-(Diphenylmethyleneamino)-4-(1,4-dioxaspiro[4.4]nonan-6-yl)butanoate 9b

$[\alpha]_D^{24}$  = 91.6 ( $c$  1.0,  $CHCl_3$ );  $^1H$  NMR  $\delta$  1.21-1.42 (3H, m), 1.44 (9H, s), 1.57-1.74 (4H, m), 1.81-1.94 (4H, m), 3.81-3.91 (5H, m), 7.17-7.19 (2H, m), 7.29-7.44 (6H, m), 7.63-7.65 (2H, m);  $^{13}C$  NMR  $\delta$  20.6, 25.4, 28.1, 29.4, 31.6, 32.5, 35.8, 46.0, 64.4, 64.6, 66.3, 80.7, 118.2, 127.9, 128.3, 128.4, 128.8, 130.1, 136.8, 139.8, 169.8, 171.6; IR (neat) 1030, 1148, 1732, 2953  $cm^{-1}$ ; HRMS (ESI-TOF) Calcd. for  $C_{28}H_{36}NO_4$ : 450.2639 ( $[M + H]^+$ ), Found: 450.2619 ( $[M + H]^+$ ).

#### Determination of the Enantiomeric Excess of 12b

The enantiomeric excess of 12b was determined by HPLC analysis after conversion to the corresponding benzamide. Daicel Chiralpak AS-H, hexane/2-propanol = 10/1, flow rate 1.0 mL/min,  $\lambda$  = 254 nm, retention time: 16.4 min (major) and 22.3 min (minor).  $[\alpha]_D^{20}$  = 41.6 ( $c$  0.7,  $CHCl_3$ ; 99% ee);  $^1H$  NMR (toluene-d<sub>8</sub>, 80 °C)  $\delta$  0.92-1.06 (4H, m), 1.12 (9H, s), 1.27 (3H, br), 1.51-1.57 (1H, m), 1.65-1.73 (2H, m), 1.84-1.88 (1H, m), 4.04 (1H, br), 4.68 (1H, br), 6.86-6.89 (3H, m), 7.13-7.15 (2H, m);  $^{13}C$  NMR  $\delta$  24.4, 27.7, 28.1, 30.9, 31.8, 33.1, 39.6, 57.2, 60.2, 83.8, 129.9, 131.2, 140.4, 141.6, 174.4, 174.6; IR (neat) 1153, 1368, 1414, 1603, 1726, 2972  $cm^{-1}$ ; HRMS (ESI-TOF) Calcd. for  $C_{20}H_{28}NO_3$ : 330.2064 ( $[M + H]^+$ ), Found: 330.2069 ( $[M + H]^+$ ).

H]<sup>+</sup>).

**Diastereo-mixture of (2*R*)-*tert*-Butyl 2-(Diphenylmethyleamino)-4-(1,4-dioxaspiro[4.5]decan-6-yl)butanoate 9c**

(2*R*,4*R*)/(2*R*,4*S*) = 1/1.  $[\alpha]_D^{22} = 87.9$  (*c* 1.0, CHCl<sub>3</sub>); <sup>1</sup>H NMR  $\delta$  1.18-1.34 (4H, m), 1.41-1.44 (2H, m), 1.44 (4.5H, s), 1.45 (4.5H, s), 1.47-1.50 (1H, m), 1.59-1.62 (2H, m), 1.65-1.81 (3H, m), 1.97-2.00 (1H, m), 3.81-3.93 (5H, m), 7.16-7.20 (2H, m), 7.29-7.44 (6H, m), 7.63-7.66 (2H, m); <sup>13</sup>C NMR  $\delta$  21.8, 23.8, 23.9, 24.49, 24.52, 24.6, 24.7, 28.1, 29.0, 29.2, 31.8, 31.9, 34.8, 34.9, 44.39, 44.43, 64.61, 64.64, 64.7, 64.8, 66.3, 66.7, 80.7, 82.0, 110.80, 110.83, 127.89, 127.91, 127.93, 128.0, 128.26, 128.28, 128.36, 128.42, 128.75, 128.77, 130.01, 130.03, 136.8, 136.9, 139.8, 139.9, 169.5, 169.8, 171.6, 171.7; IR (neat) 1150, 1368, 1732, 2932 cm<sup>-1</sup>; HRMS (ESI-TOF) Calcd. for C<sub>29</sub>H<sub>38</sub>NO<sub>4</sub>: 464.2795 ([M + H]<sup>+</sup>), Found: 464.2785 ([M + H]<sup>+</sup>).

**Determination of the Enantiomeric Excess of 12c**

The enantiomeric excess of 12c was determined by HPLC analysis after conversion to the corresponding benzamide. Daicel Chiralpak AS-H, hexane/2-propanol = 10/1, flow rate 1.0 mL/min,  $\lambda = 254$  nm, retention time: 13.6 min (major) and 16.5 min (minor).  $[\alpha]_D^{19} = 67.1$  (*c* 1.0, CHCl<sub>3</sub>; 99% ee); <sup>1</sup>H NMR (toluene-d<sub>8</sub>, 80 °C)  $\delta$  1.23-1.33 (4H, m), 1.51 (9H, s), 1.54-1.67 (2H, m), 1.73-1.88 (3H, m), 2.01-2.12 (2H, m), 2.27-2.28 (1H, m), 2.46 (1H, d, *J* = 12.4 Hz), 4.45 (1H, br), 5.05 (1H, br), 7.15-7.17 (1H, m), 7.23-7.30 (3H, m), 7.57-7.59 (1H, m); <sup>13</sup>C NMR  $\delta$  24.7, 29.3, 30.1, 30.9, 34.9, 35.8, 38.0, 39.3, 55.9, 58.0, 83.9, 129.9, 131.2, 140.4, 141.4, 174.1, 174.2; IR (neat) 1153, 1325, 1368, 1411, 1638, 1724, 2930 cm<sup>-1</sup>; HRMS (ESI-TOF) Calcd. for C<sub>21</sub>H<sub>29</sub>NNaO<sub>3</sub>: 366.2040 ([M + H]<sup>+</sup>), Found: 366.2033 ([M + H]<sup>+</sup>).

**(*R,Z*)-*tert*-Butyl 2-(Diphenylmethyleamino)-6,6-dimethoxy-4-methylhex-4-enoate 14a**

Daicel Chiralpak OD-H, hexane/2-propanol = 50/1, flow rate 0.5 mL/min,  $\lambda = 254$  nm, retention time: 17.2 min (minor) and 23.4 min (major).  $[\alpha]_D^{19} = 82.2$  (*c* 0.9, CHCl<sub>3</sub>; 92% ee); <sup>1</sup>H NMR  $\delta$  1.45 (9H, s), 1.52 (3H, d, *J* = 1.2 Hz), 2.56-2.68 (2H, m), 3.15 (3H, s), 3.26 (3H, s), 4.07 (1H, dd, *J* = 8.3, 5.1 Hz), 4.95 (1H, d, *J* = 6.4 Hz), 5.30 (1H, dd, *J* = 6.4, 0.8 Hz), 7.14-7.18 (2H, m), 7.28-7.46 (6H, m), 7.62-7.65 (2H, m); <sup>13</sup>C NMR  $\delta$  17.1, 28.0, 43.4, 51.5, 52.6, 64.7, 81.2, 100.1, 124.9, 127.91, 127.94, 128.3, 128.5, 128.8, 130.1, 136.4, 138.1, 139.6, 170.0, 171.0; IR (neat) 1053, 1150, 1734, 2367 cm<sup>-1</sup>; HRMS (ESI-TOF) Calcd. for C<sub>26</sub>H<sub>34</sub>NO<sub>4</sub>: 424.2482 ([M + H]<sup>+</sup>), Found: 424.2465 ([M + H]<sup>+</sup>).

**(2*R*,4*S*)-*tert*-Butyl 4-Methylpiperidine-2-carboxylate 15a**

Daicel Chiralpak AD-H, hexane/2-propanol = 10/1, flow rate 0.5 mL/min,  $\lambda = 220$  nm, retention time: 19.2 min (major) and 42.7 min (minor).  $[\alpha]_D^{21} = 8.8$  (*c* 0.4, CHCl<sub>3</sub>; 92% ee); <sup>1</sup>H NMR  $\delta$  0.94 (3H, d, *J* = 6.4 Hz), 0.95-1.05 (2H, m), 1.46 (9H, s), 1.48-1.63 (2H, m), 1.93-1.99 (1H, m), 2.60 (1H, td, *J* = 12.5, 2.7 Hz), 3.11-3.16 (1H, m), 3.18 (1H, dd, *J* = 11.7, 2.7 Hz); <sup>13</sup>C NMR  $\delta$  22.4, 28.0, 31.3, 34.7, 38.1, 45.8, 59.6, 80.8, 172.6; IR (neat) 1161, 1269, 1368, 1732, 2924, 2949 cm<sup>-1</sup>; HRMS (ESI-TOF) Calcd. for C<sub>11</sub>H<sub>22</sub>NO<sub>2</sub>: 200.1645 ([M + H]<sup>+</sup>), Found: 200.1641 ([M + H]<sup>+</sup>).

### Synthesis of (Z)-2-(3-(Benzyloxy)-2-(bromomethyl)prop-1-enyl)-1,3-dioxolane 13b

2-(3-Bromo-2-(bromomethyl)prop-1-enyl)-1,3-dioxolane was prepared by a similar method described in literature.<sup>11, 12</sup> <sup>1</sup>H NMR  $\delta$  3.89-3.97 (2H, m), 3.99- 4.07 (2H, m), 4.13 (2H, s), 4.27 (2H, d,  $J = 1.6$  Hz), 5.55 (1H, dd,  $J = 6.0, 1.6$  Hz), 5.77 (1H, dd,  $J = 6.0, 0.8$  Hz); <sup>13</sup>C NMR  $\delta$  26.4, 34.3, 65.1, 98.9, 130.4, 138.7; IR (neat) 939, 1051, 1117, 1207, 1396, 2887  $\text{cm}^{-1}$ .

The title compound was prepared by a similar method described in literature<sup>13</sup> starting from 2-(3-bromo-2-(bromomethyl)prop-1-enyl)-1,3-dioxolane. <sup>1</sup>H NMR  $\delta$  3.82-3.93 (2H, m), 3.95-4.05 (2H, m), 4.08 (2H, s), 4.28 (2H, s), 4.52 (2H, s), 5.50 (1H, d,  $J = 6.8$  Hz), 5.78 (1H, d,  $J = 6.8$  Hz), 7.27-7.36 (5H, m); <sup>13</sup>C NMR  $\delta$  34.1, 64.9, 65.0, 72.5, 98.8, 127.7, 127.8, 128.4, 129.6, 137.8, 139.9; IR (neat) 1055, 1246, 1396, 1703, 2884  $\text{cm}^{-1}$ ; HRMS (ESI-TOF) Calcd. for  $\text{C}_{14}\text{H}_{17}\text{BrNaO}_3$ : 335.0253 ( $[\text{M} + \text{Na}]^+$ ), Found: 335.0247 ( $[\text{M} + \text{Na}]^+$ )

### (R,E)-tert-Butyl 4-(Benzyloxymethyl)-5-(1,3-dioxolan-2-yl)-2-(diphenylmethyleneamino)pent-4-enoate 14b

Daicel Chiralpak AD-H, Hexane/EtOH = 50/1, flow rate 0.5 mL/min,  $\lambda = 254\text{nm}$ , retention time: 19.6 min (minor) and 20.5 min (major).  $[\alpha]_{\text{D}}^{21} = 62.6$  (c 0.4,  $\text{CHCl}_3$ ; 97% ee); <sup>1</sup>H NMR  $\delta$  1.44 (9H, s), 2.67 (1H, dd,  $J = 14.0, 8.8$ ), 2.87 (1H, dd,  $J = 14.0, 4.4$  Hz), 3.75-3.83 (4H, m), 3.90-3.92 (1H, m), 3.99 (1H, d,  $J = 12.4$ ), 4.13 (1H, dd,  $J = 8.8, 4.4$  Hz), 4.29 (2H, dd,  $J = 31.2, 11.6$  Hz), 5.48 (2H, s), 7.16-7.19 (2H, m), 7.22-7.38 (11H, m), 7.60-7.64 (2H, m); <sup>13</sup>C NMR  $\delta$  28.0, 38.3, 64.7, 64.8, 64.9, 67.1, 71.8, 81.1, 99.2, 127.45, 127.48, 127.6, 127.9, 128.1, 128.3, 128.5, 128.6, 128.9, 130.0, 136.5, 138.2, 139.8, 139.9, 170.3, 170.8; IR (neat) 959, 1069, 1148, 1730, 2884  $\text{cm}^{-1}$ ; HRMS (ESI-TOF) Calcd. for  $\text{C}_{33}\text{H}_{38}\text{NO}_5$ : 528.2745 ( $[\text{M} + \text{H}]^+$ ), Found: 528.2752 ( $[\text{M} + \text{H}]^+$ ).

### (2R,4S)-tert-Butyl 4-(Hydroxymethyl)piperidine-2-carboxylate 15b

$[\alpha]_{\text{D}}^{26} = 3.1$  (c 1.4,  $\text{CHCl}_3$ ); <sup>1</sup>H NMR  $\delta$  1.08-1.21 (2H, m), 1.25 (1H, br), 1.46 (9H s), 1.62-1.72 (2H, m), 2.08 (1H, d,  $J = 14.4$ ), 2.32 (1H, br), 2.67 (1H, td,  $J = 12.4, 2.8$ ), 3.23-3.27 (2H, m), 3.48-3.55 (2H, m); <sup>13</sup>C NMR  $\delta$  28.0, 28.8, 32.4, 38.9, 45.3, 59.0, 67.8, 81.3, 172.1; IR (neat) 1045, 1732, 1254, 1732, 2930  $\text{cm}^{-1}$ ; HRMS (ESI-TOF) Calcd. for  $\text{C}_{11}\text{H}_{22}\text{NO}_3$ : 216.1594 ( $[\text{M} + \text{H}]^+$ ), Found: 216.1586 ( $[\text{M} + \text{H}]^+$ ).

### Synthesis of Selfotel (CGS-19755)

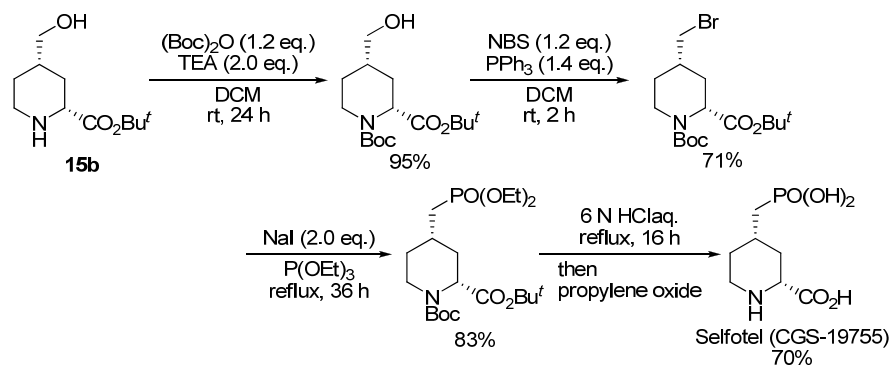

Title compound was prepared by a similar method described in literature<sup>10</sup> starting from 15b in 39%



overall yield. Spectrum data of obtained compound corresponded with literature.<sup>10</sup>

**(2R,4S)-Di-tert-butyl 4-(Hydroxymethyl)piperidine-1,2-dicarboxylate**

95% yield.  $[\alpha]_D^{26} = 39.4$  (c 1.5, CHCl<sub>3</sub>); <sup>1</sup>H NMR  $\delta$  1.45 (9H, s), 1.47 (9H, s), 1.70-1.80 (1H, m), 1.91-1.97 (2H, m), 2.03-2.08 (1H, m), 2.26 (1H, br), 3.08 (1H, br), 3.46 (1H, dd,  $J = 11.2, 7.6$  Hz), 3.54 (1H, dd,  $J = 11.2, 6.8$  Hz), 3.76 (1H, br), 4.41 (1H, br); <sup>13</sup>C NMR  $\delta$  25.2, 26.7, 27.8, 28.0, 28.3, 53.78, 53.81, 63.6, 79.8, 81.5, 155.5, 172.4; IR (neat) 1152, 1366, 1697, 1734, 2976, 3435 cm<sup>-1</sup>; HRMS (ESI-TOF) Calcd. for C<sub>16</sub>H<sub>29</sub>NNaO<sub>5</sub> : 338.1938 ([M + Na]<sup>+</sup>), Found: 338.1923 ([M + Na]<sup>+</sup>).

**(2R,4S)-tert-Butyl 4-(Bromomethyl)piperidine-2-carboxylate**

71% yield.  $[\alpha]_D^{23} = 7.8$  (c 0.9, CHCl<sub>3</sub>); <sup>1</sup>H NMR  $\delta$  1.45 (9H, s), 1.48 (9H, s), 1.66-1.68 (1H, m), 1.79-1.86 (1H, m), 2.03-2.10 (3H, m), 3.17 (1H, br), 3.33-3.41 (2H, m), 3.75 (1H, m), 4.35-4.38 (1H, m); <sup>13</sup>C NMR  $\delta$  27.5, 27.9, 28.0, 28.3, 29.3, 33.9, 36.0, 53.7, 80.0, 81.5, 155.5, 171.8; IR (neat) 1150, 1366, 1697, 1732, 2976 cm<sup>-1</sup>; HRMS (ESI-TOF) Calcd. for C<sub>16</sub>H<sub>28</sub>BrNNaO<sub>4</sub> : 400.1094 ([M + Na]<sup>+</sup>), Found: 400.1088 ([M + Na]<sup>+</sup>).

**(2R,4S)-Di-tert-butyl 4-((Diethoxyphosphoryl)methyl)piperidine-1,2-dicarboxylate**

83% yield.  $[\alpha]_D^{25} = 27.0$  (c 0.4, CHCl<sub>3</sub>); <sup>1</sup>H NMR  $\delta$  1.30 (6H, m), 1.44 (9H, s), 1.46 (9H, s), 1.63- 1.84 (4H, m), 1.95-2.08 (2H, m), 2.16-2.24 (1H, m), 3.21 (1H, br), 3.72 (1H, br), 4.04-4.12 (4H, m), 4.35 (1H, dd,  $J = 6.8, 5.2$  Hz); <sup>13</sup>C NMR  $\delta$  14.1, 16.4 (d,  $J = 2.7$  Hz), 16.5 (d,  $J = 2.7$  Hz), 27.9, 28.27, 28.31, 29.1 (d,  $J = 5.8$  Hz), 29.7, 32.1 (d,  $J = 13.2$  Hz), 53.8, 61.4 (d,  $J = 6.6$  Hz), 61.5 (d,  $J = 6.6$  Hz), 79.9, 81.4, 155.7, 172.0; IR (neat) 1030, 1163, 1248, 1699, 2359, 2926, 2978 cm<sup>-1</sup>; HRMS (ESI-TOF) Calcd. for C<sub>20</sub>H<sub>38</sub>NNaO<sub>7</sub>P : 458.2278 ([M + Na]<sup>+</sup>), Found: 458.2285 ([M + Na]<sup>+</sup>).

**References**

- (1) (a) Eils, S.; Rossen, K.; Jahn, W.; Klement, I. *Eur. Pat. Appl.* 1207151. (b) O'Donnell, M. J.; Polt, M. J. *J. Org. Chem.* **1982**, *47*, 2663-2666.
- (2) Wang, X.; Kitamura, M.; Maruoka, K. *J. Am. Chem. Soc.* **2007**, *129*, 1038.
- (3) Kitamura, M.; Shirakawa, S.; Arimura, Y.; Wang, X.; Maruoka, K. *Chem. Asian J.* **2008**, *3*, 1702.
- (4) Townsend, C. A.; Christensen, S. B.; Davis, Steven G. *J. Chem. Soc. Perkin Trans. 1* **1988**, 839.
- (5) Collins, D. J.; James, A. M. *Aust. J. Chem.* **1989**, *42*, 215.
- (6) Pumar, M. C.; Mourino, A.; Castedo, L.; Fac. Quim. *Anales de Quimica, Serie C: Quimica Organica y Bioquimica*, **1988**, *84(1)*, 105.
- (7) Gaonac'h, O.; Maddaluno, J.; Duhamel, L. *J. Org. Chem.* **1991**, *56*, 4045.
- (8) Swarbrick, M. E.; Gosselin, F.; Lubell, W. D. *J. Org. Chem.* **1999**, *64*, 1993.
- (9) Swarbrick, M. E.; Lubell, W. D. *Chirality* **2000**, *12*, 366.
- (10) Hutchison, A. J.; Williams, M.; Angst, C.; Jesus, R.; Blanchard, L.; Jackson, R. H.; Wilusz, E. J.; Murphy, D. E.; Bernard, P. S.; Schneider, J.; Campbell, T.; Guida, W.; Sills, M. A. *J. Med. Chem.* **1989**, *32*, 2171.

- (11) Kinoshita, M.; Takami, H.; Taniguchi, M.; Tamai, T. *Bull. Chem. Soc. Jpn.* **1987**, *60*, 2151.
- (12) Lu, T.; Yang, J.; Sheu, L. *J. Org. Chem.* **1995**, *60*, 2931.
- (13) Xu, L.; Reignier, T.; Lemiegre, L.; Cardinael, P.; Combret, J.; Bouillon, J.; Blanchet, J.; Rouden, J.; Marchand, A. H.; Maddaluno, J.; *Org. Lett.* **2008**, *10*(5), 729.

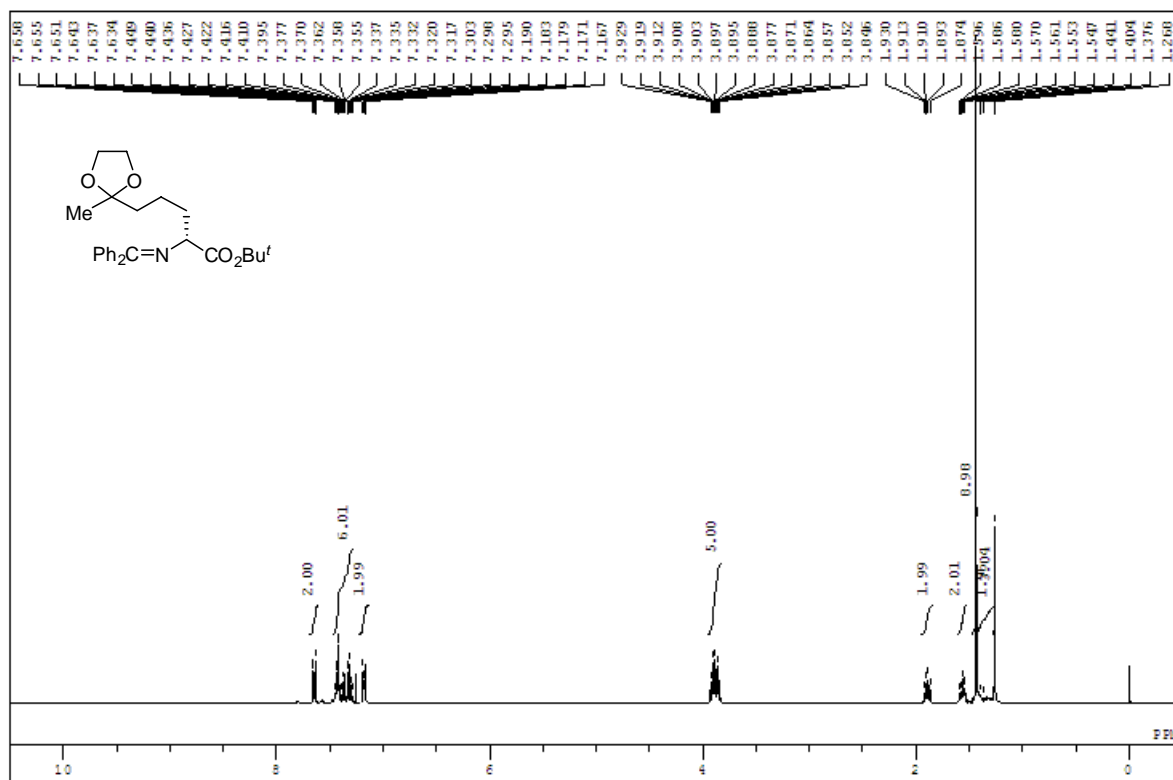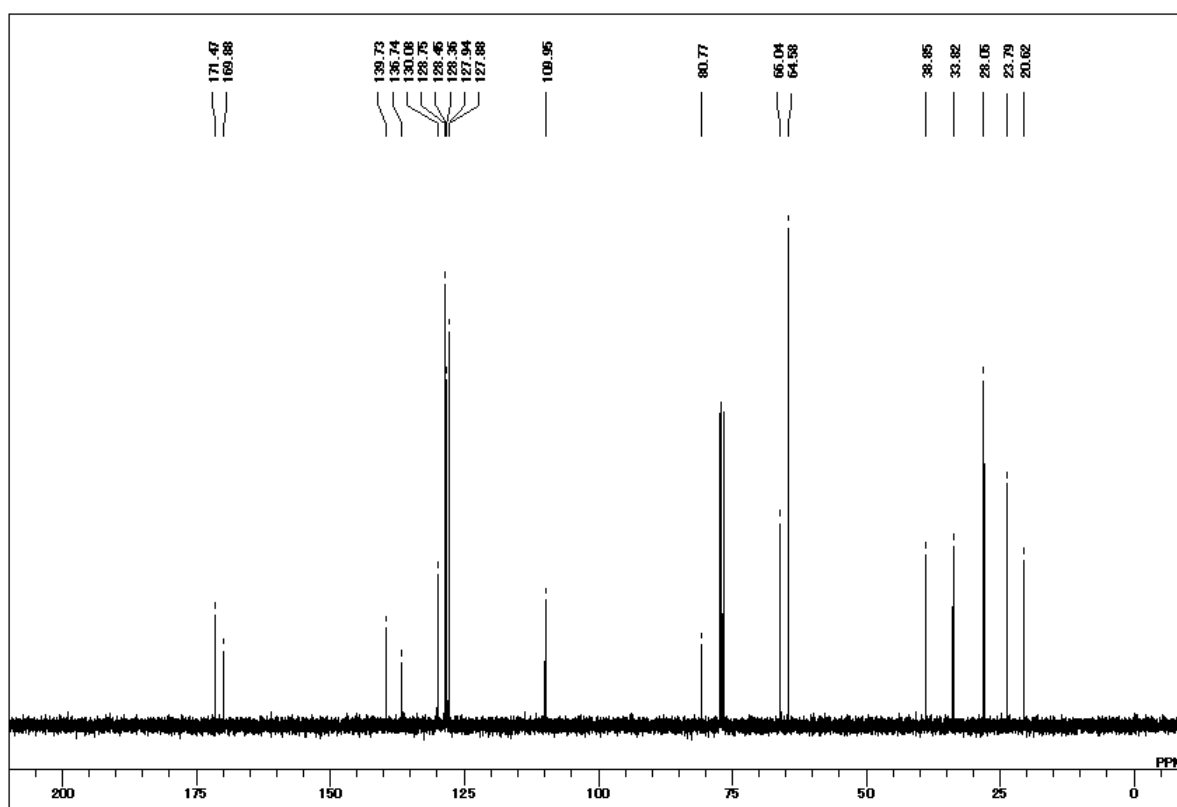

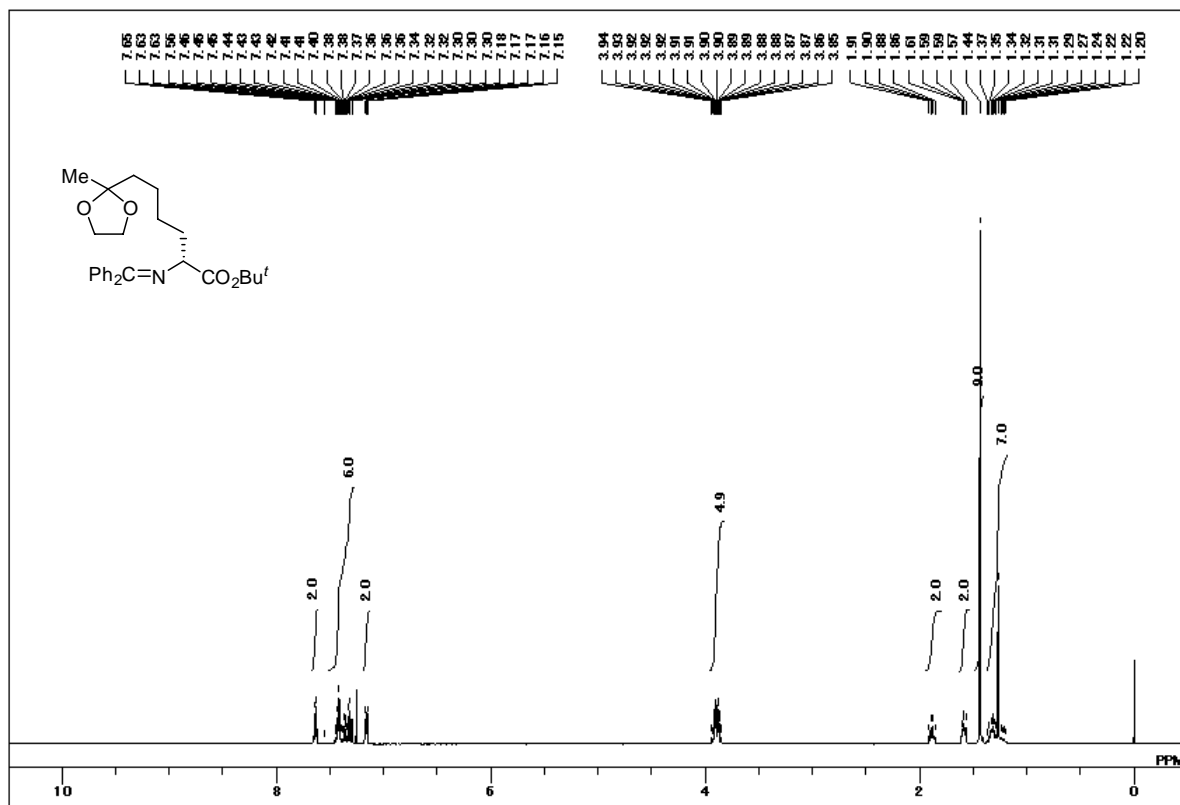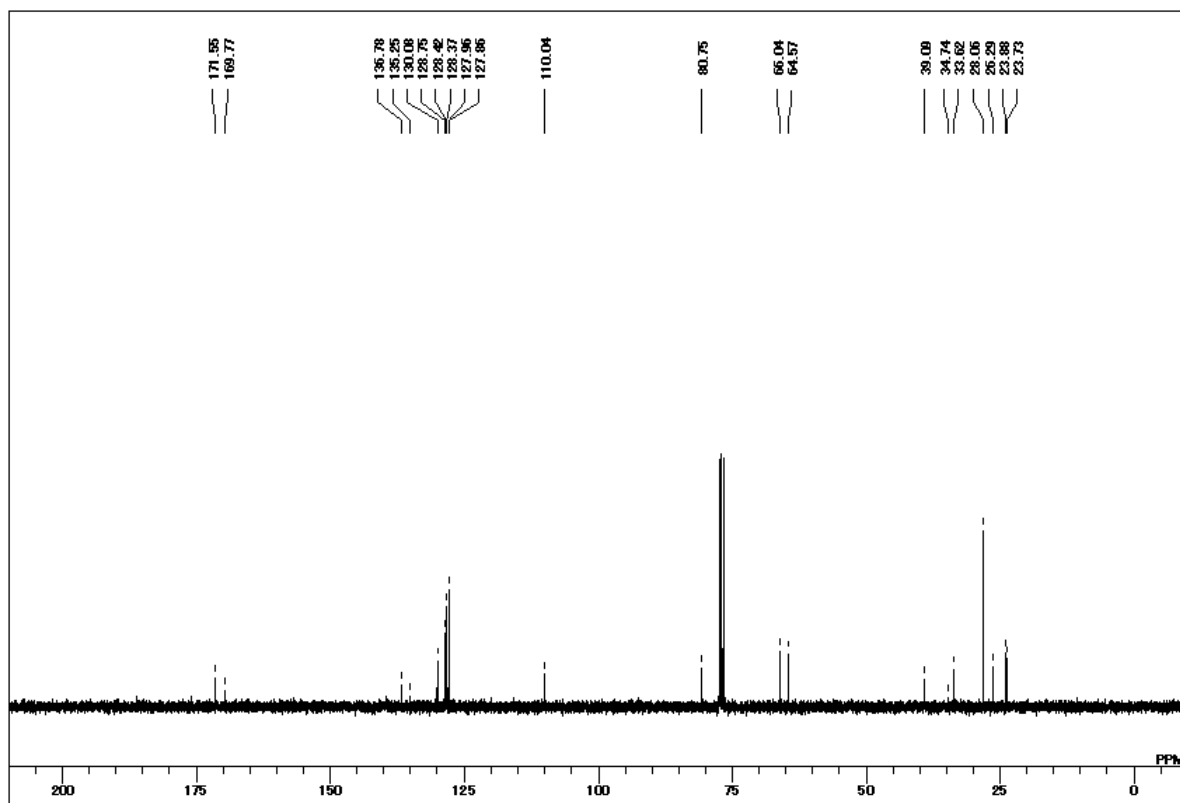

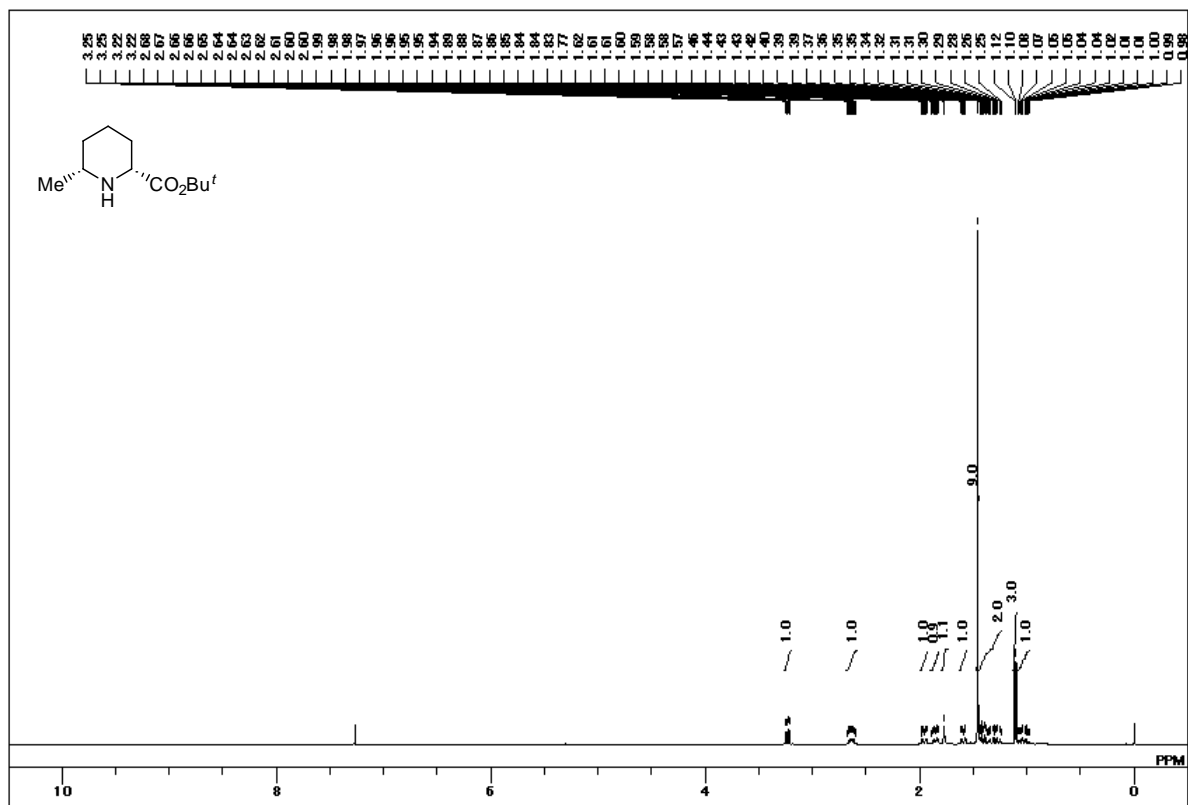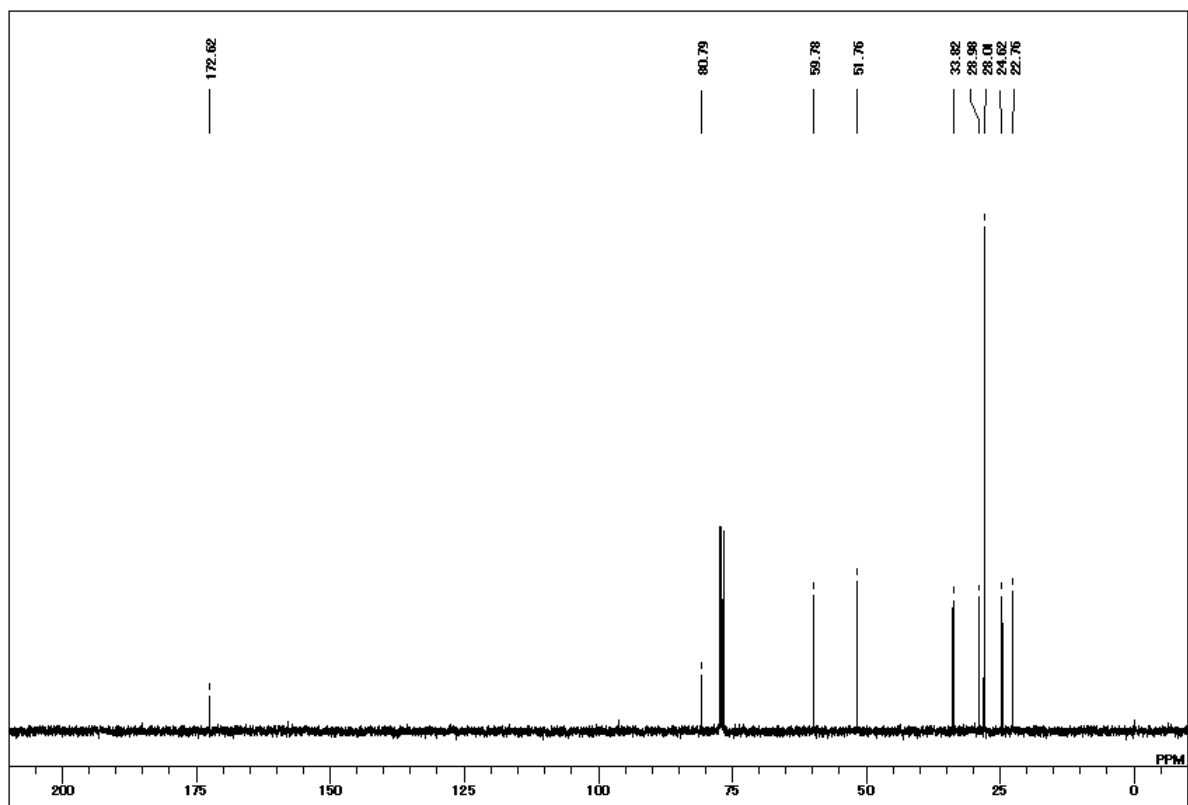

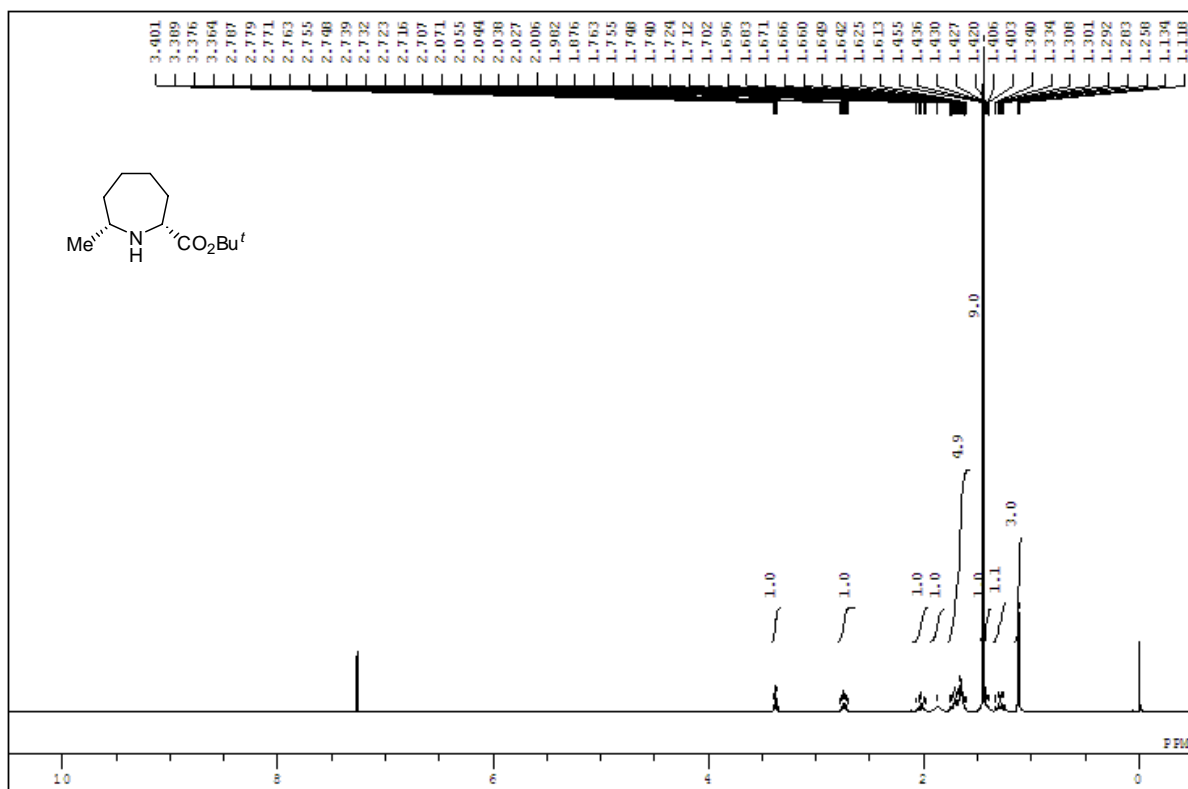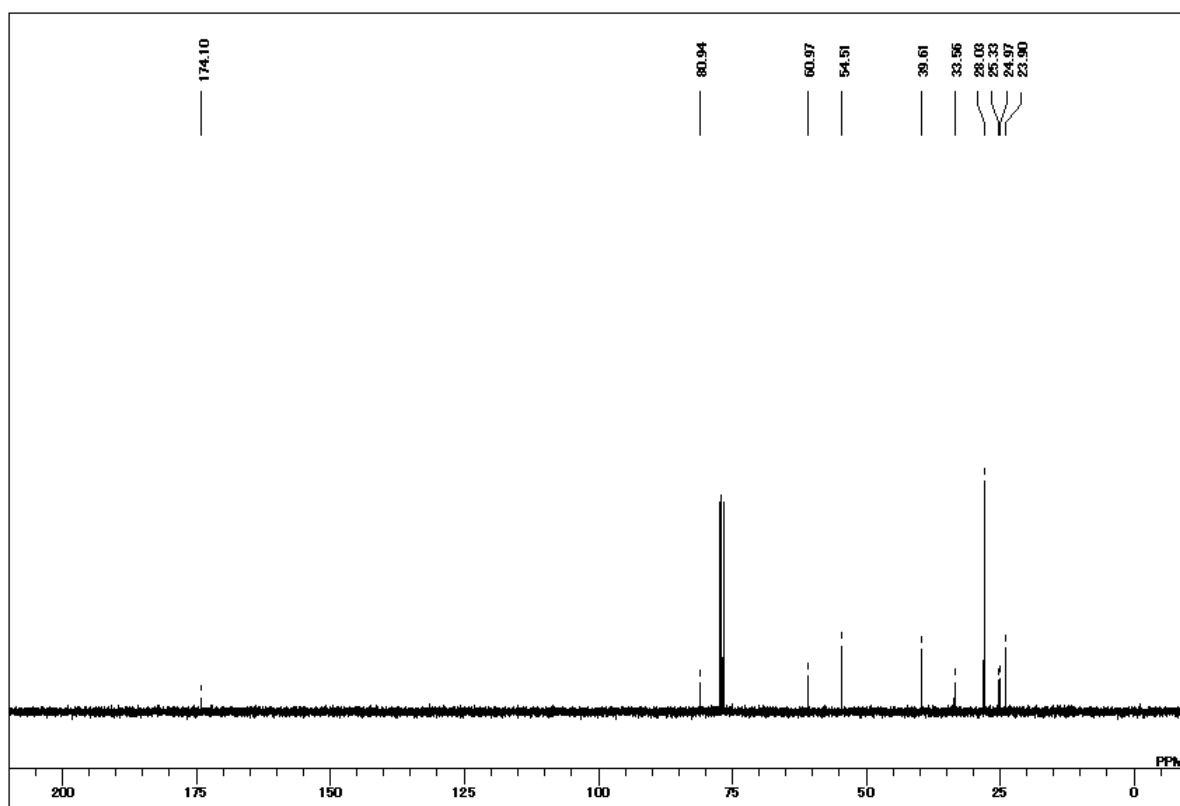

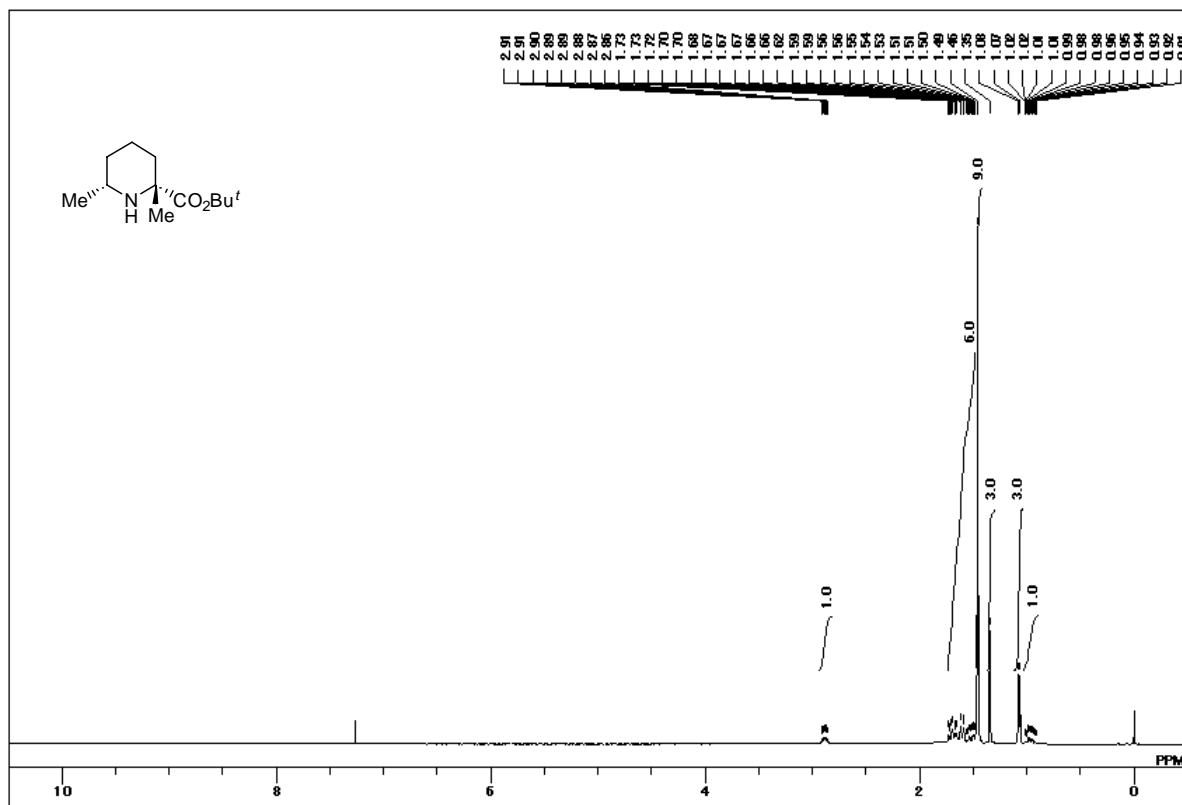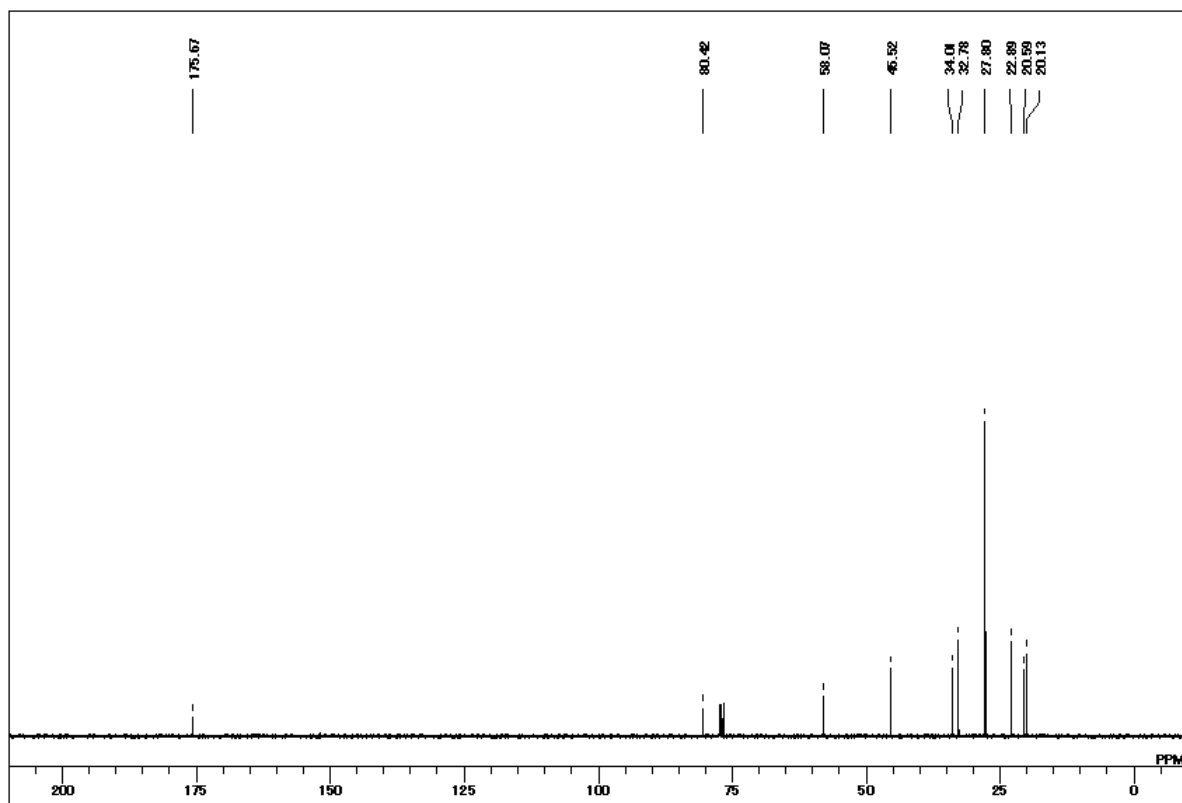

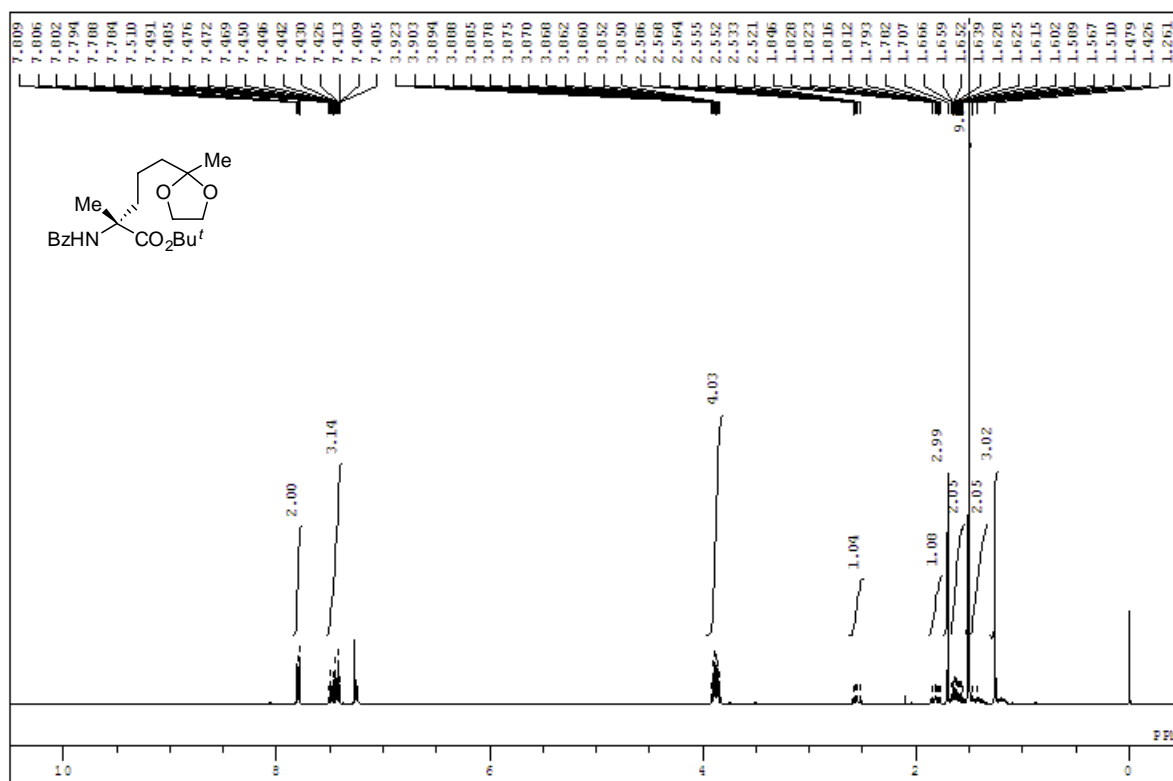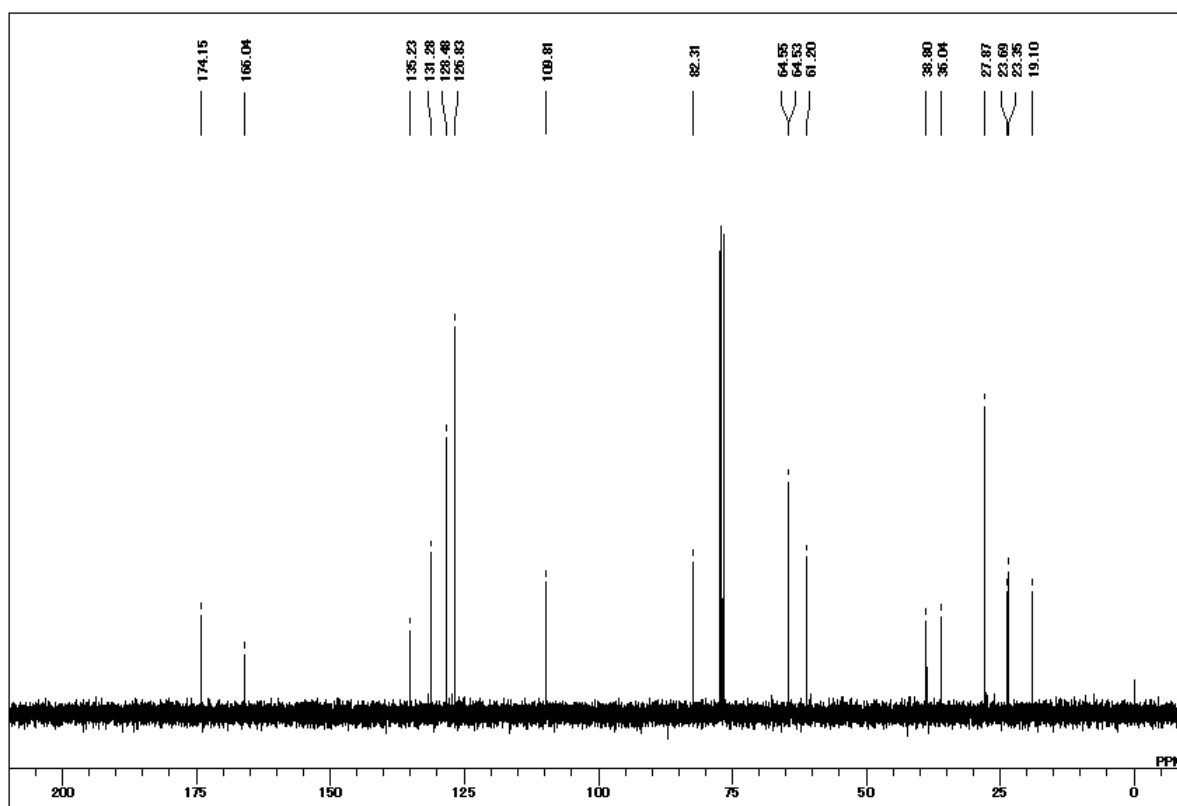



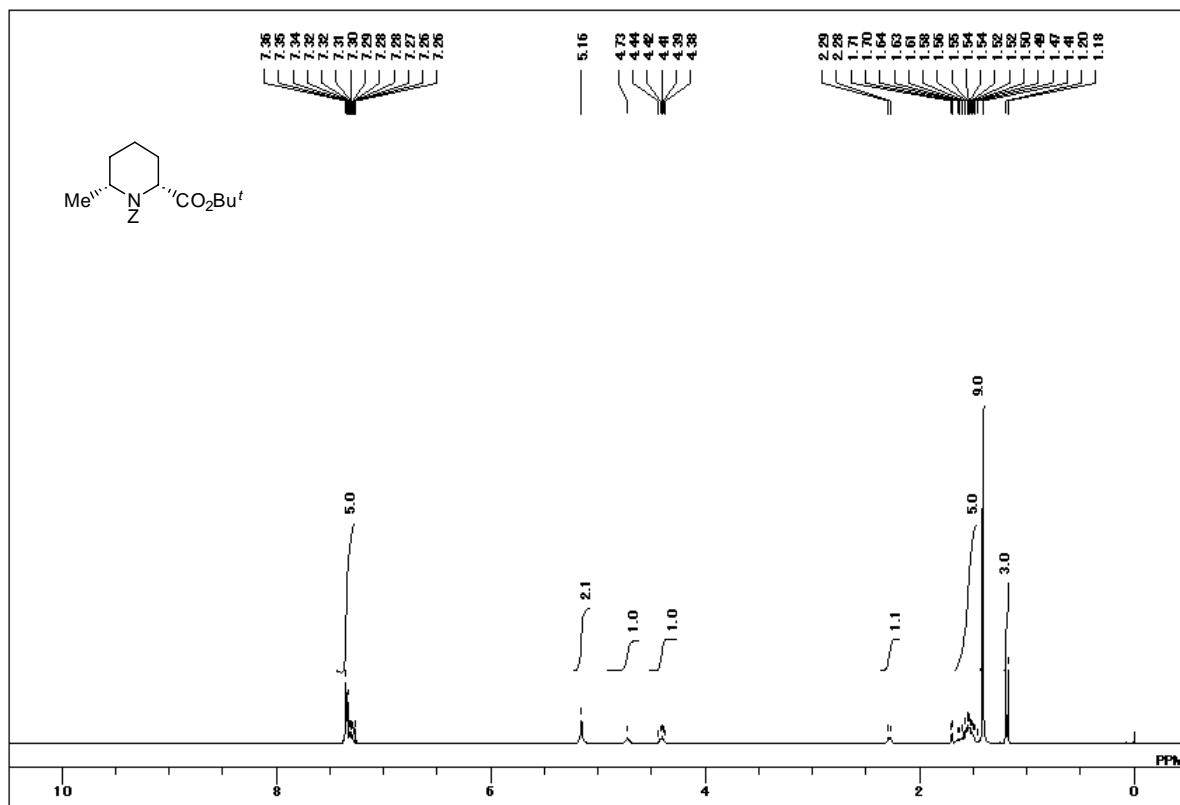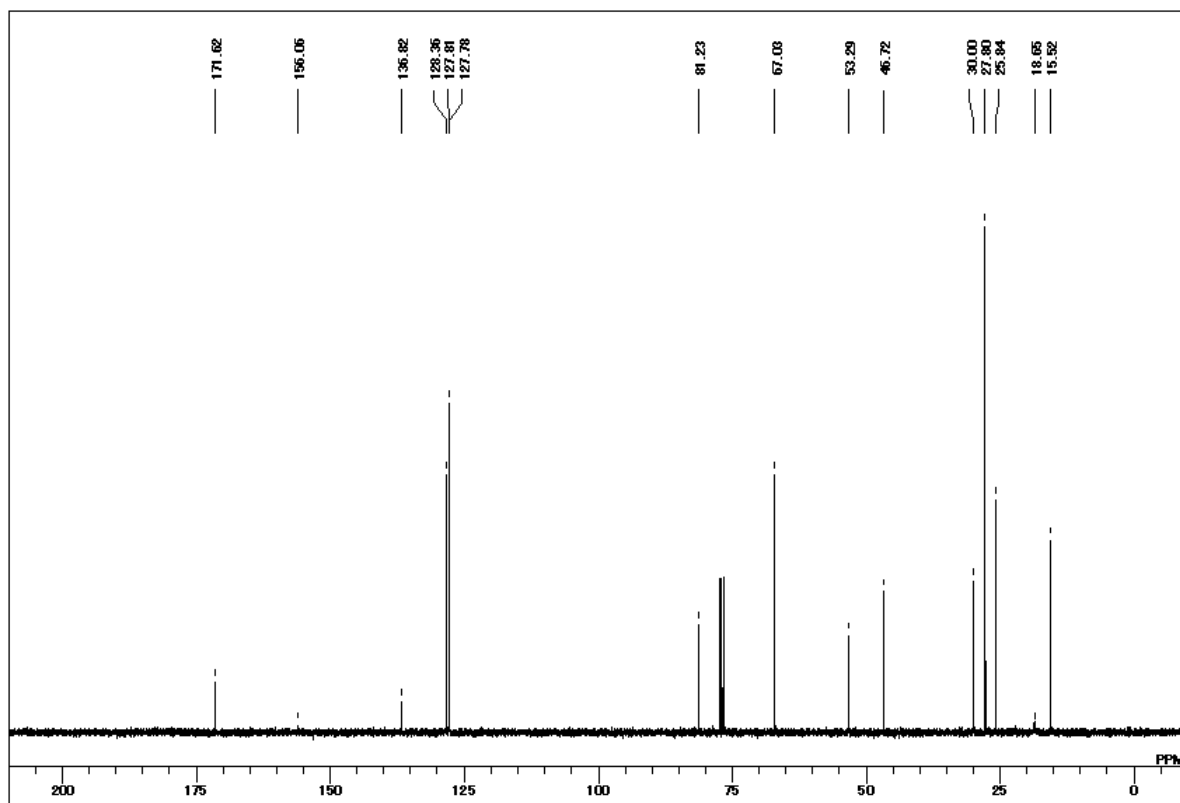

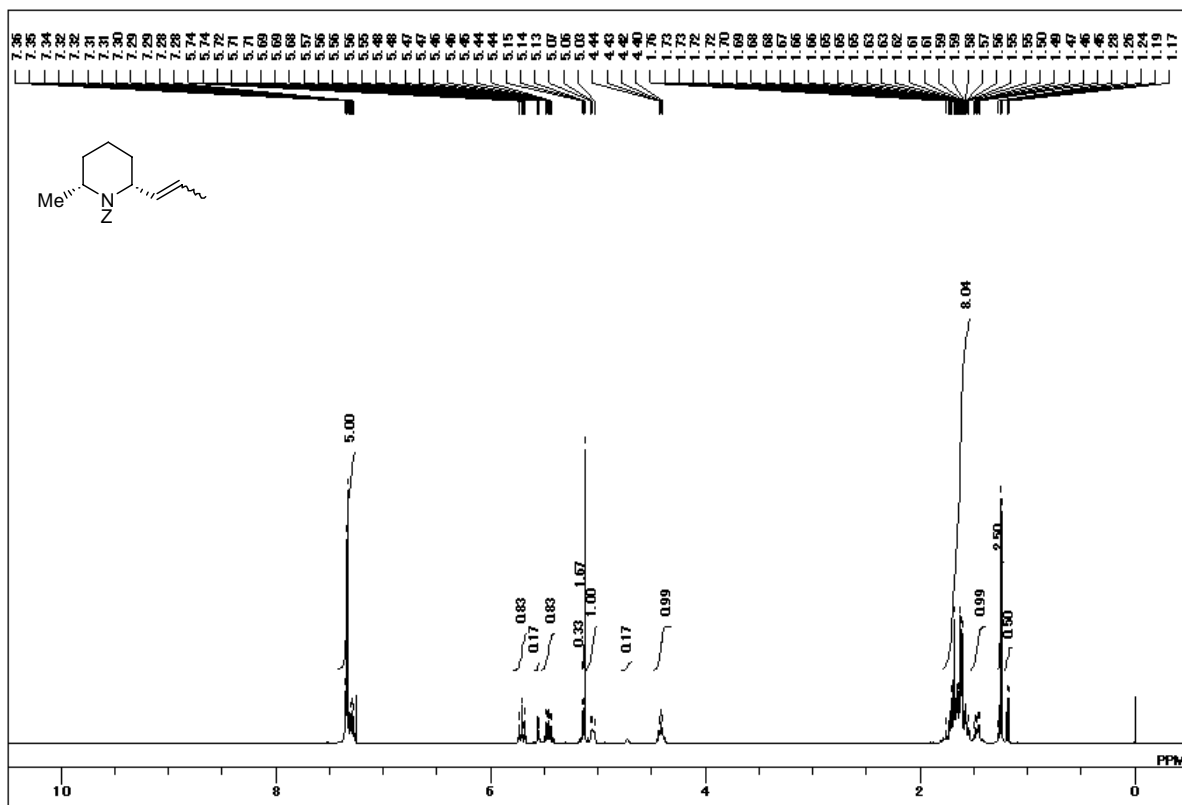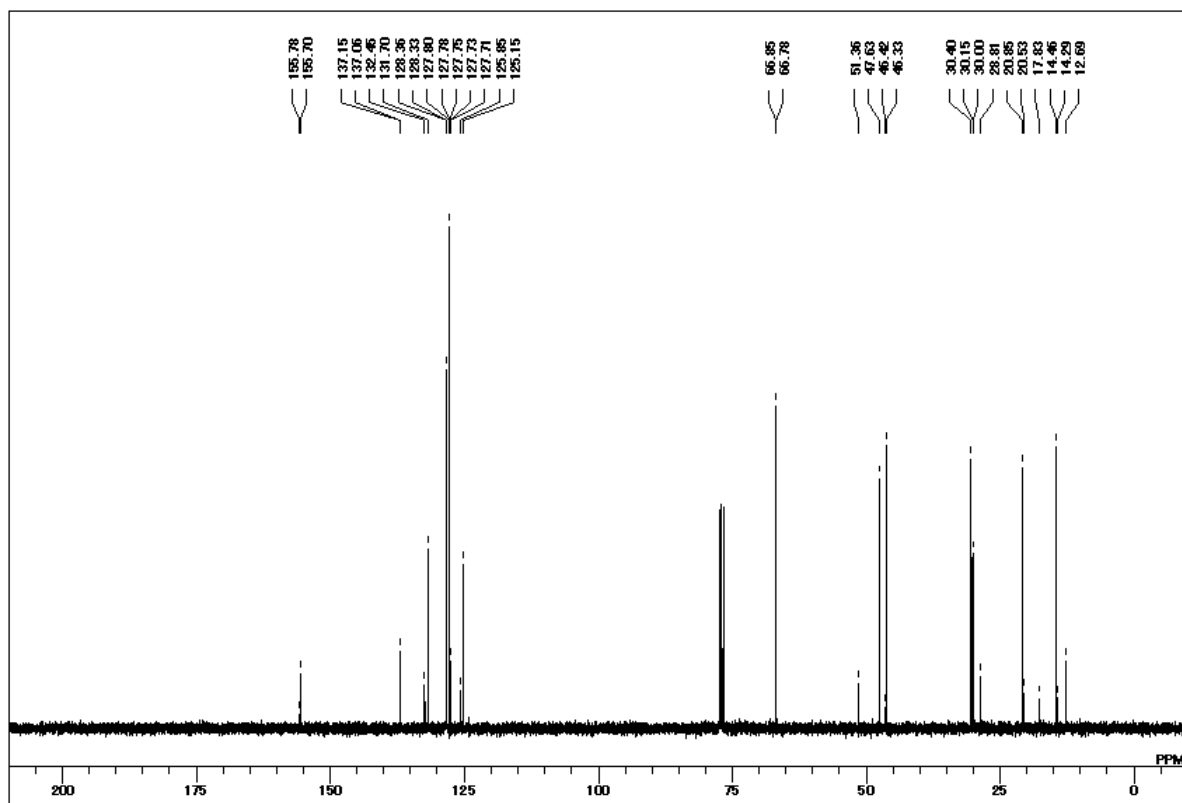

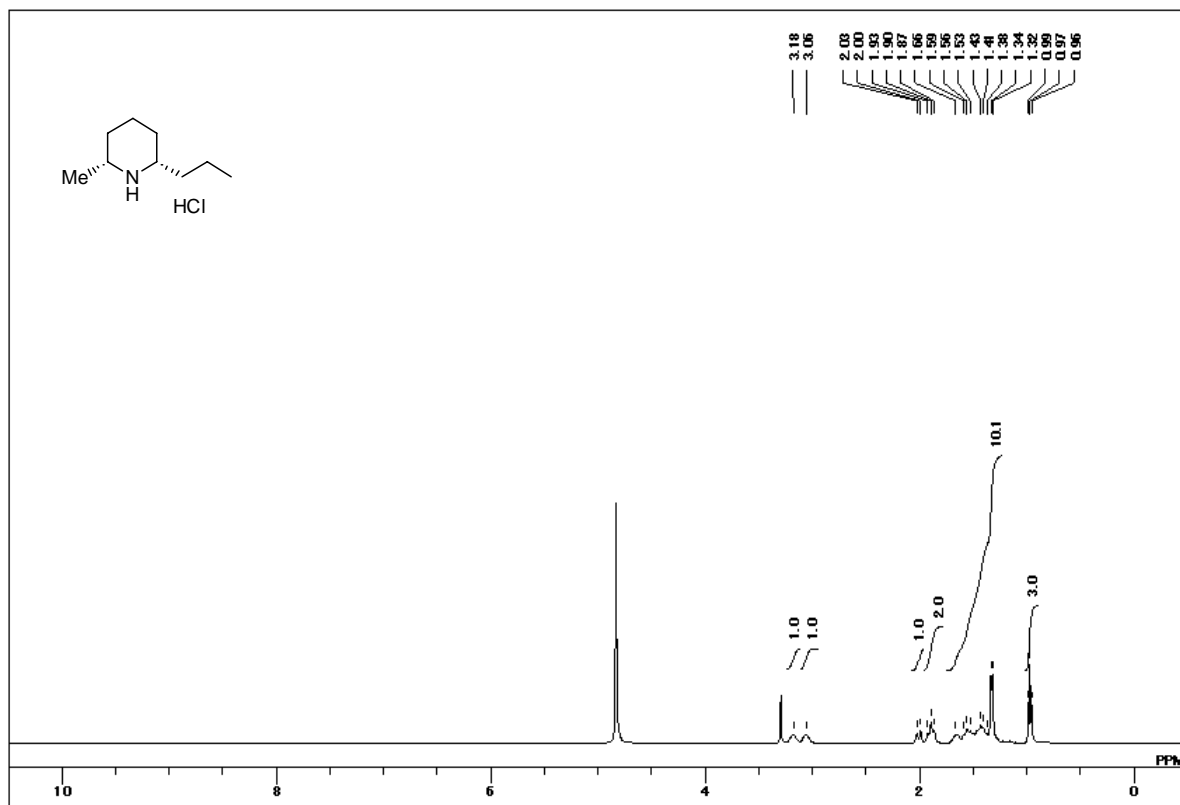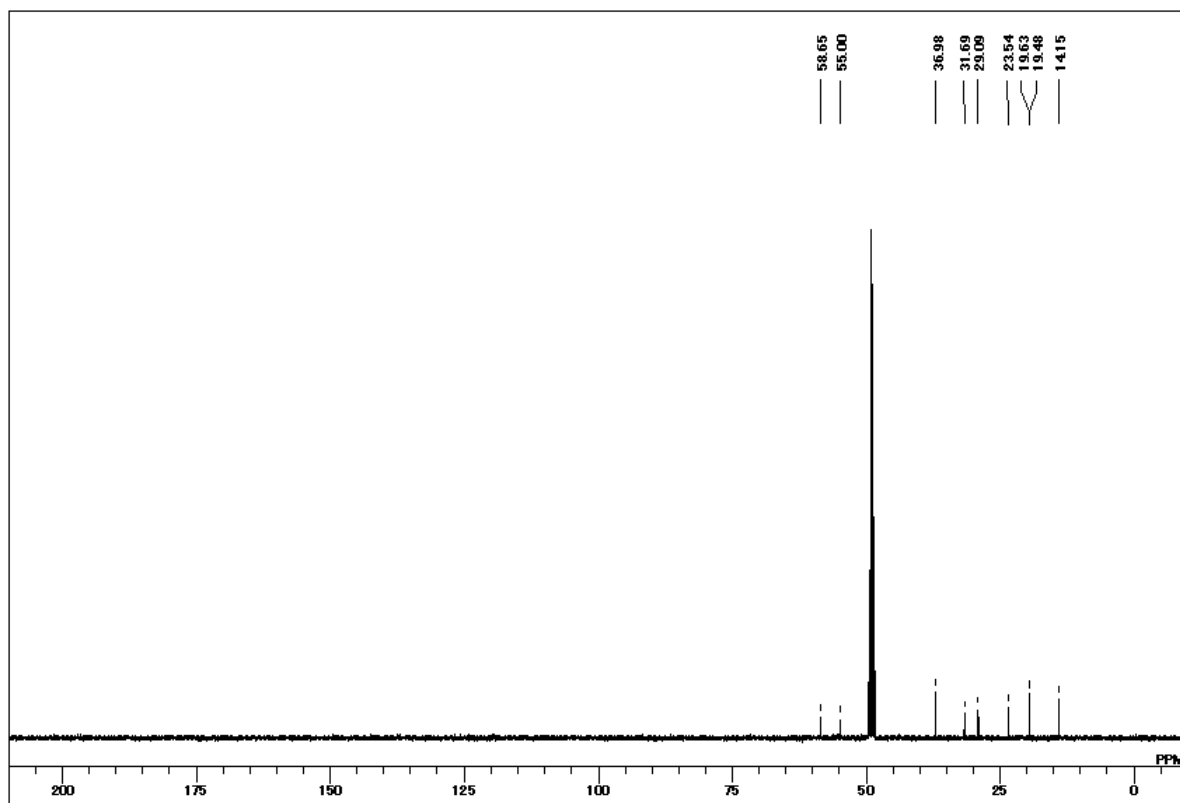

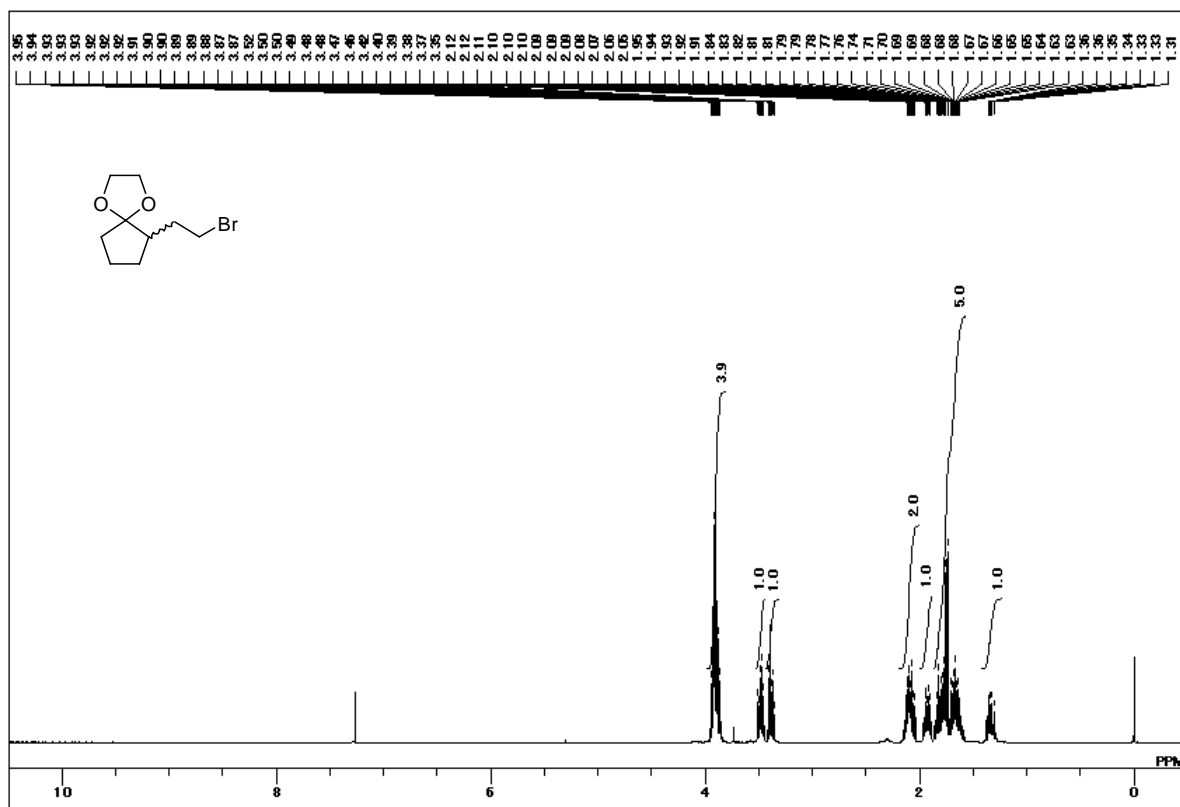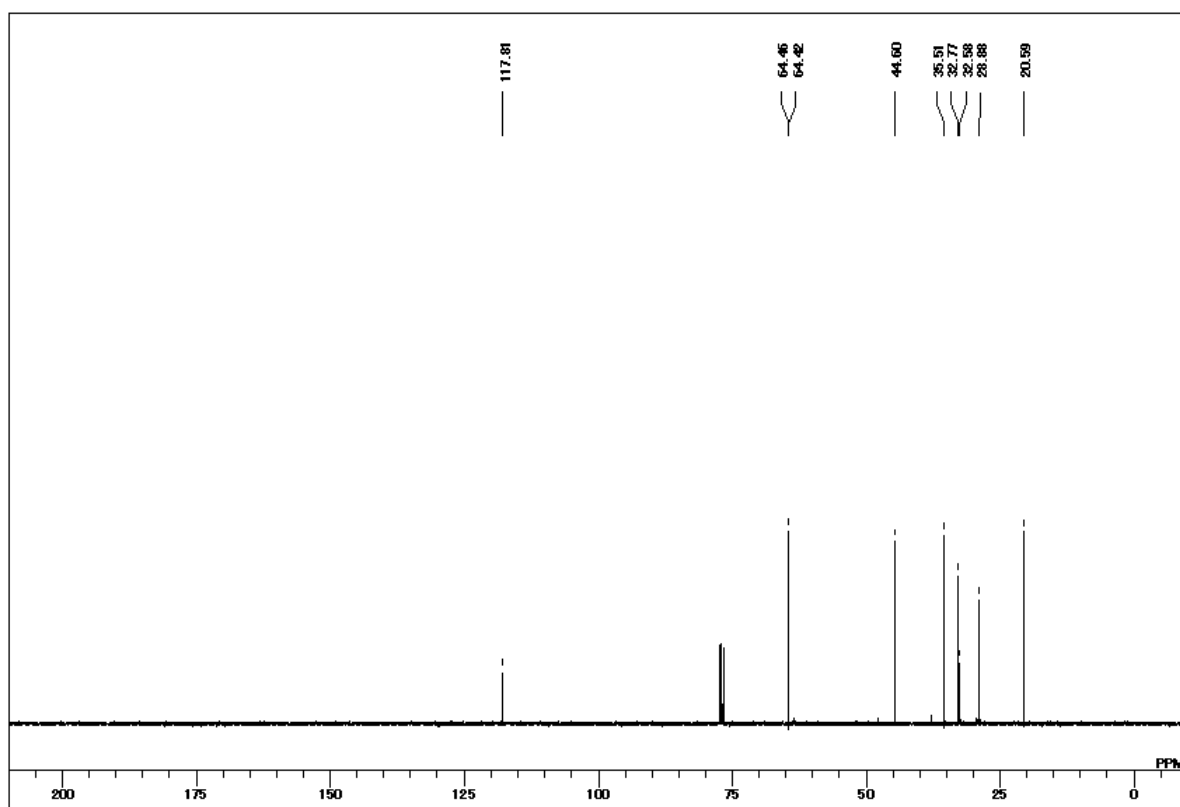

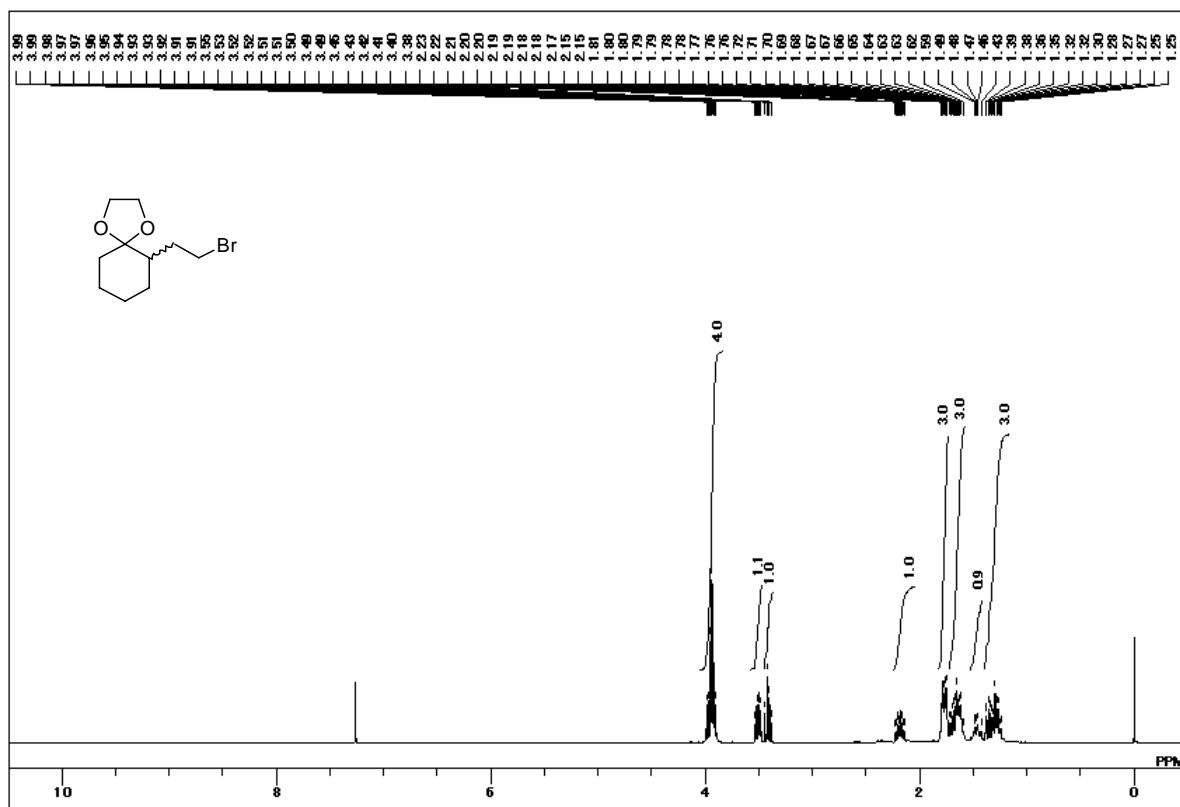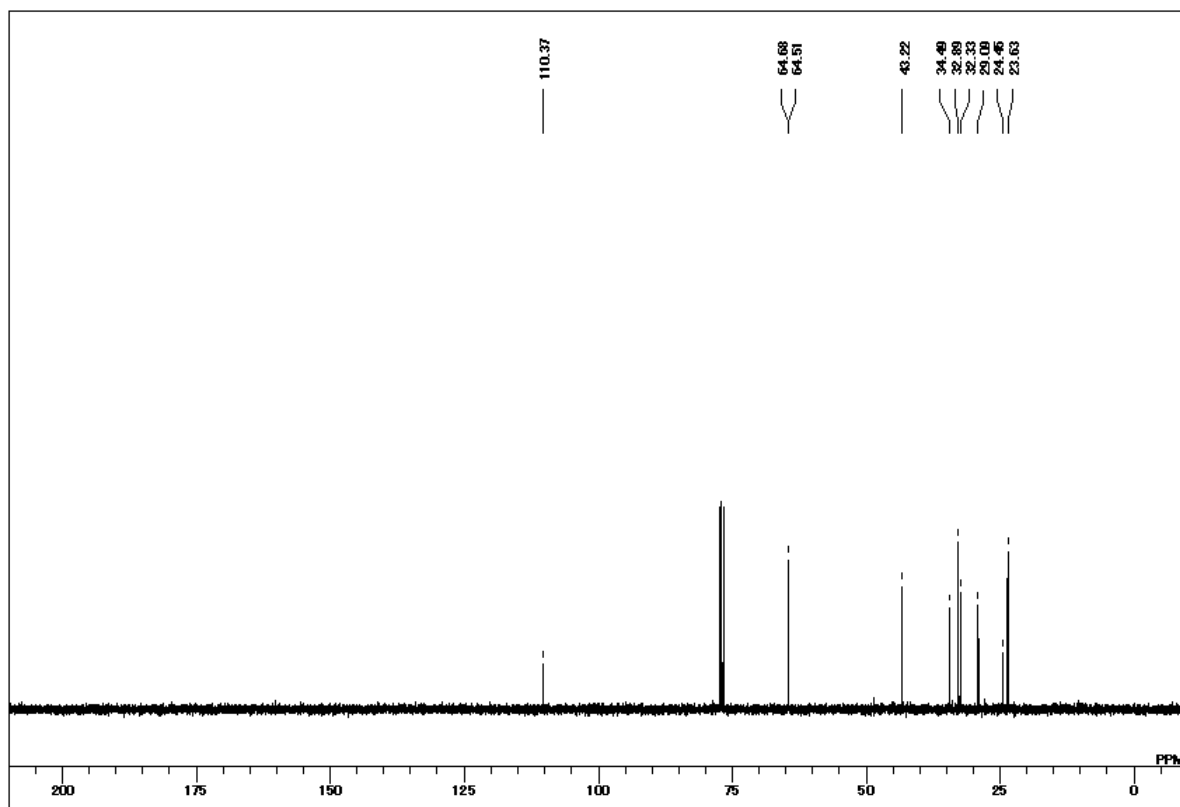

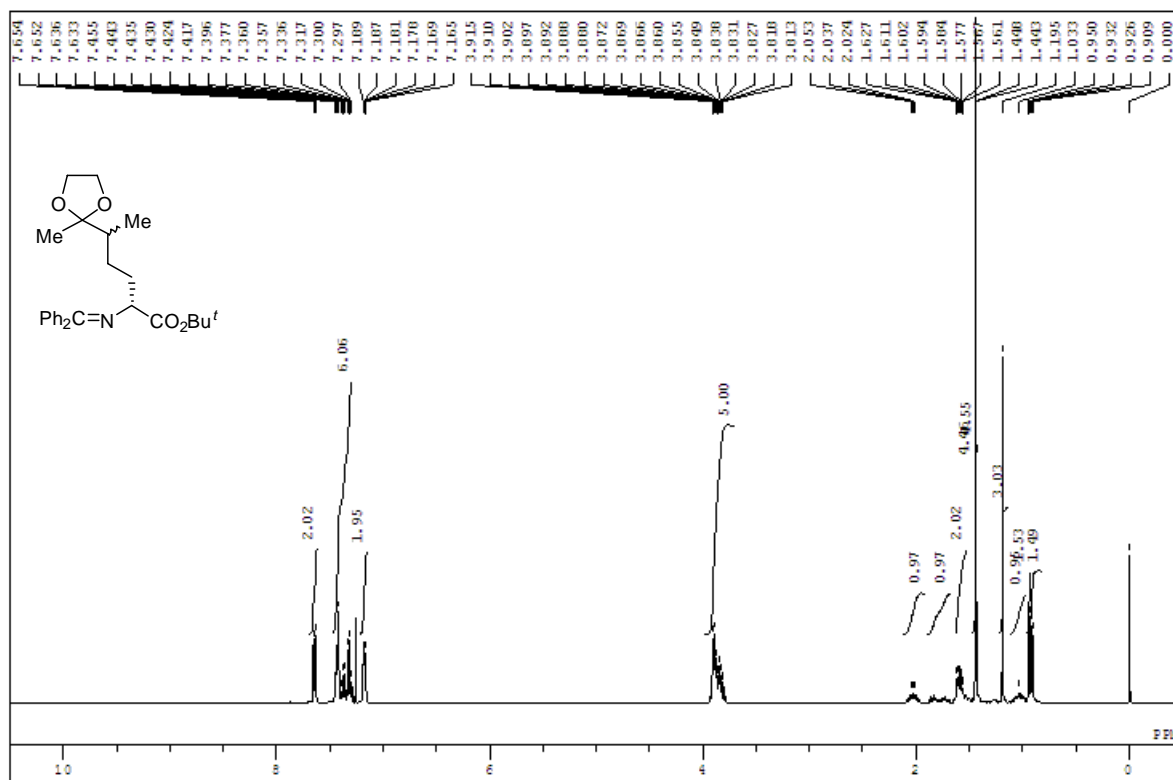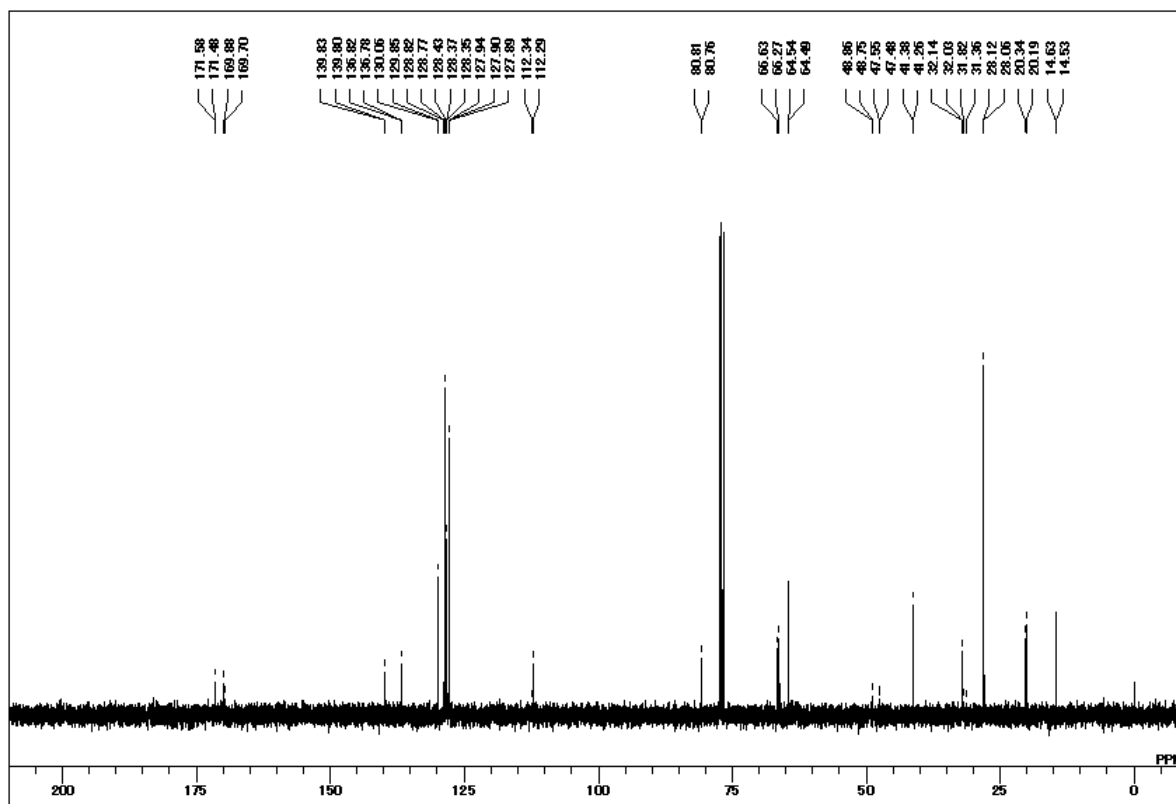

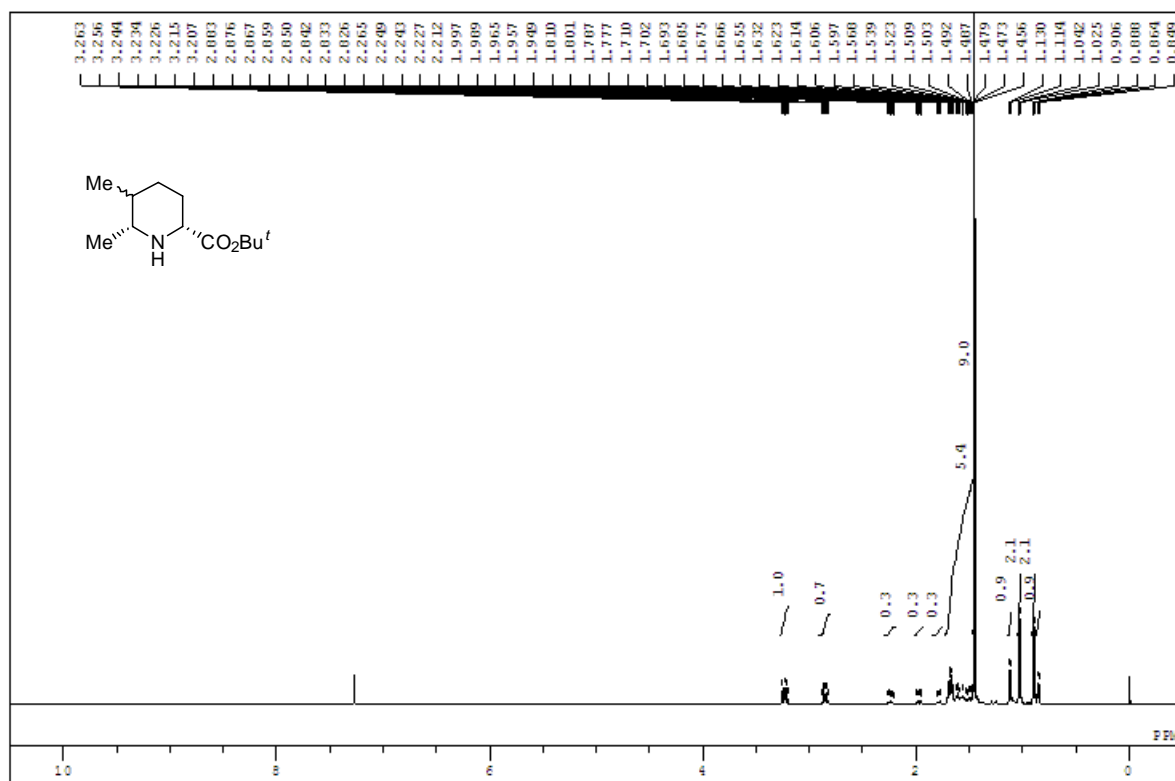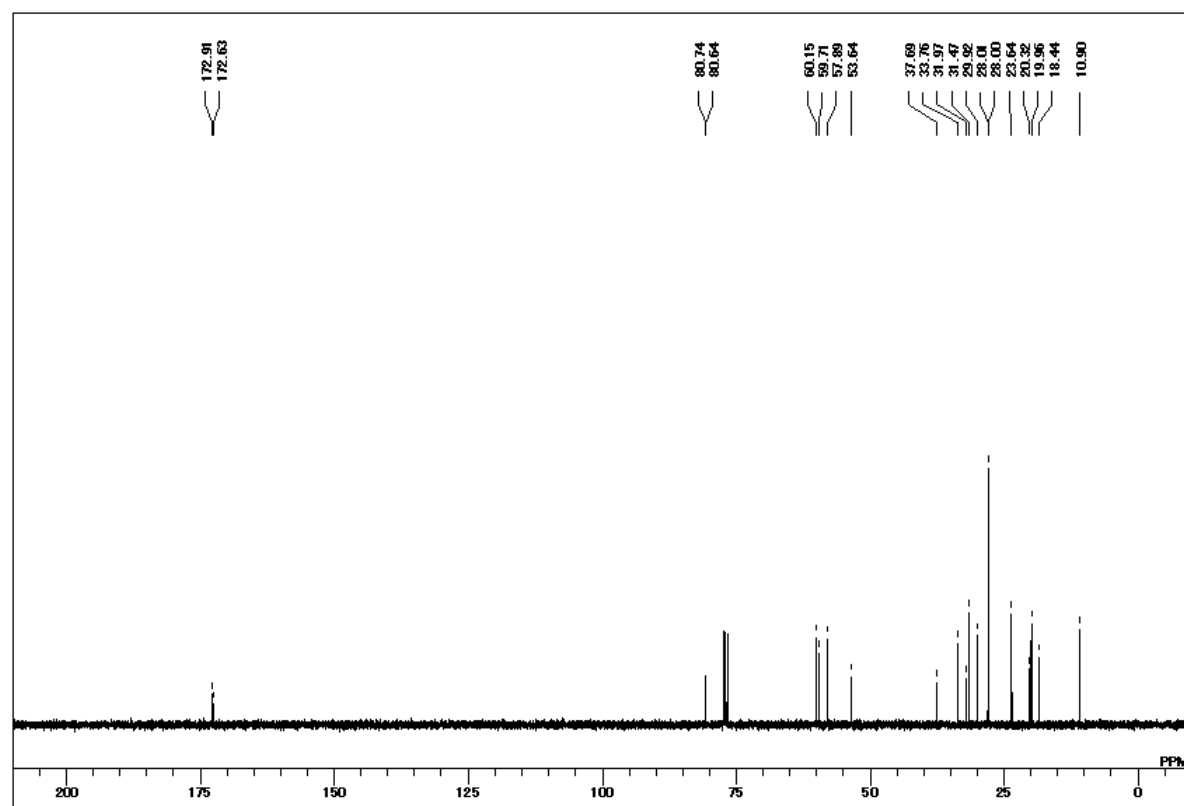

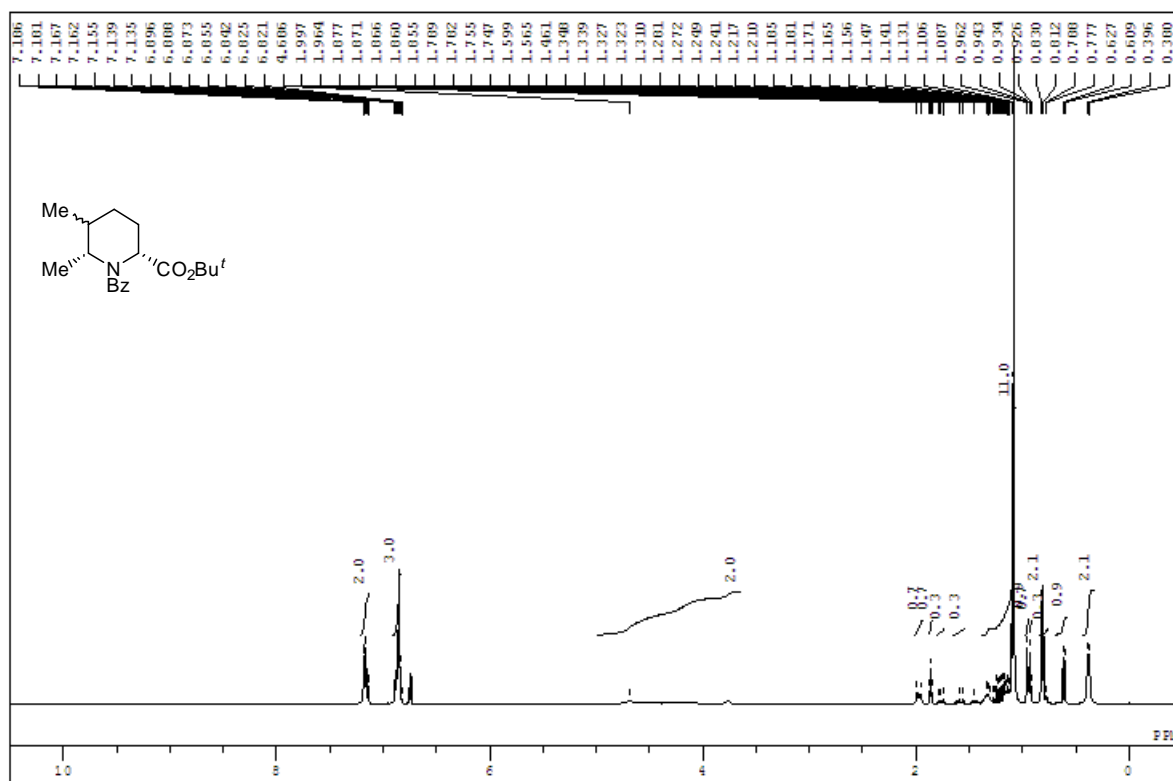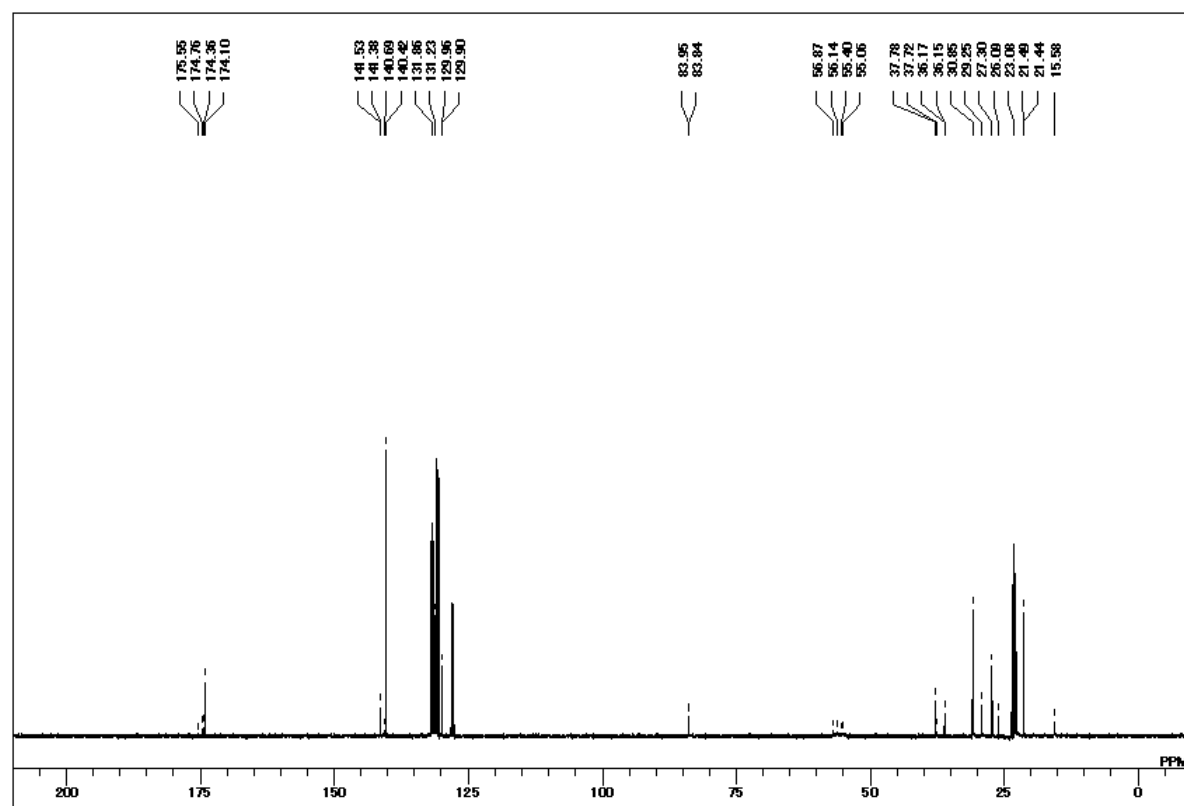



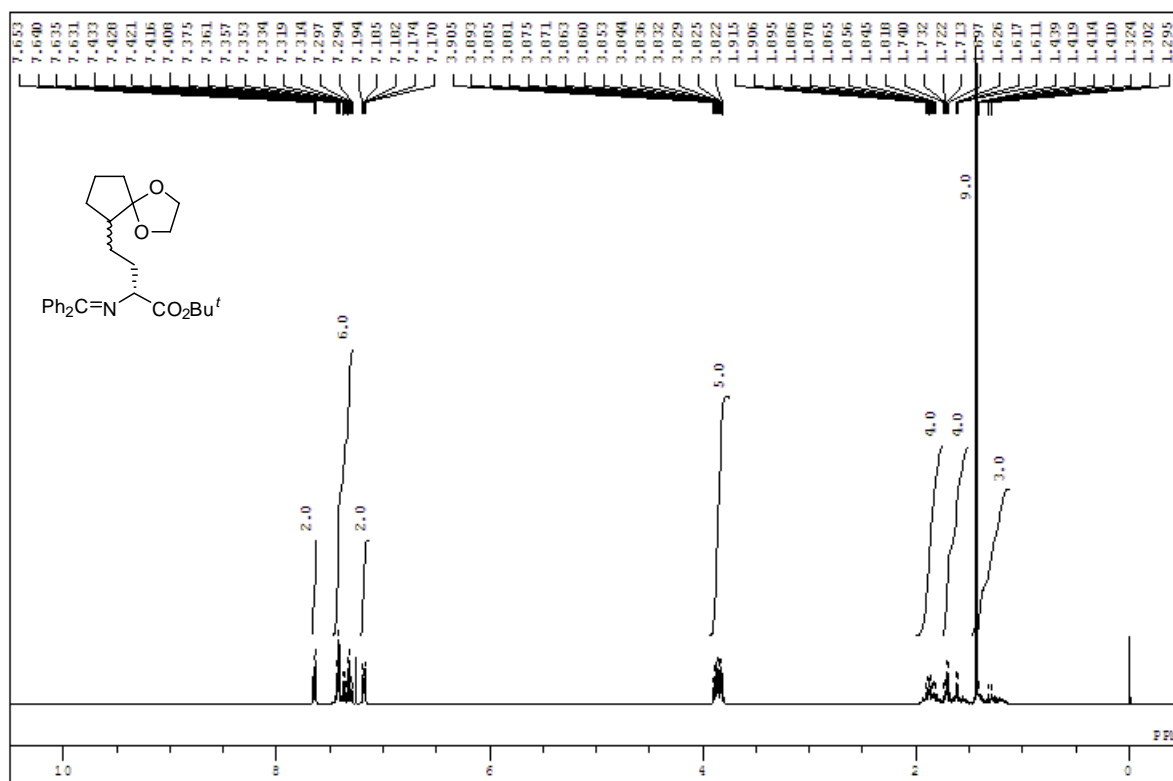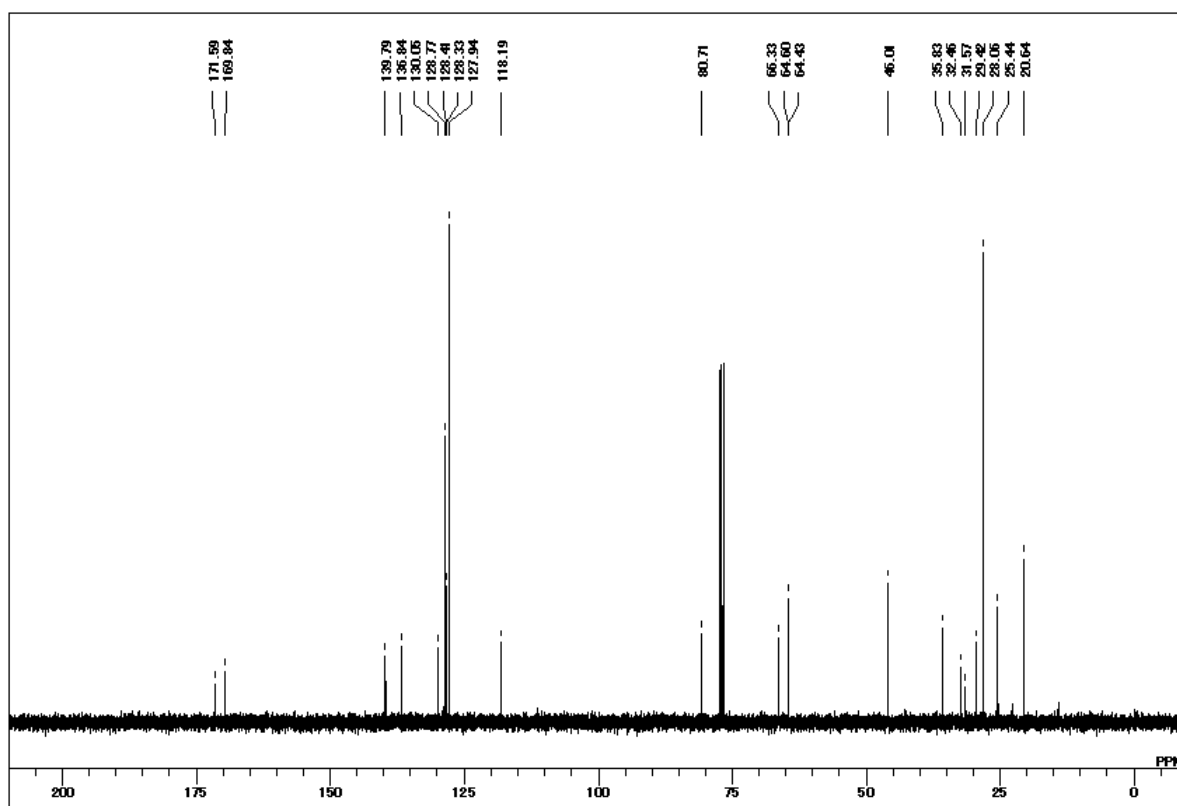

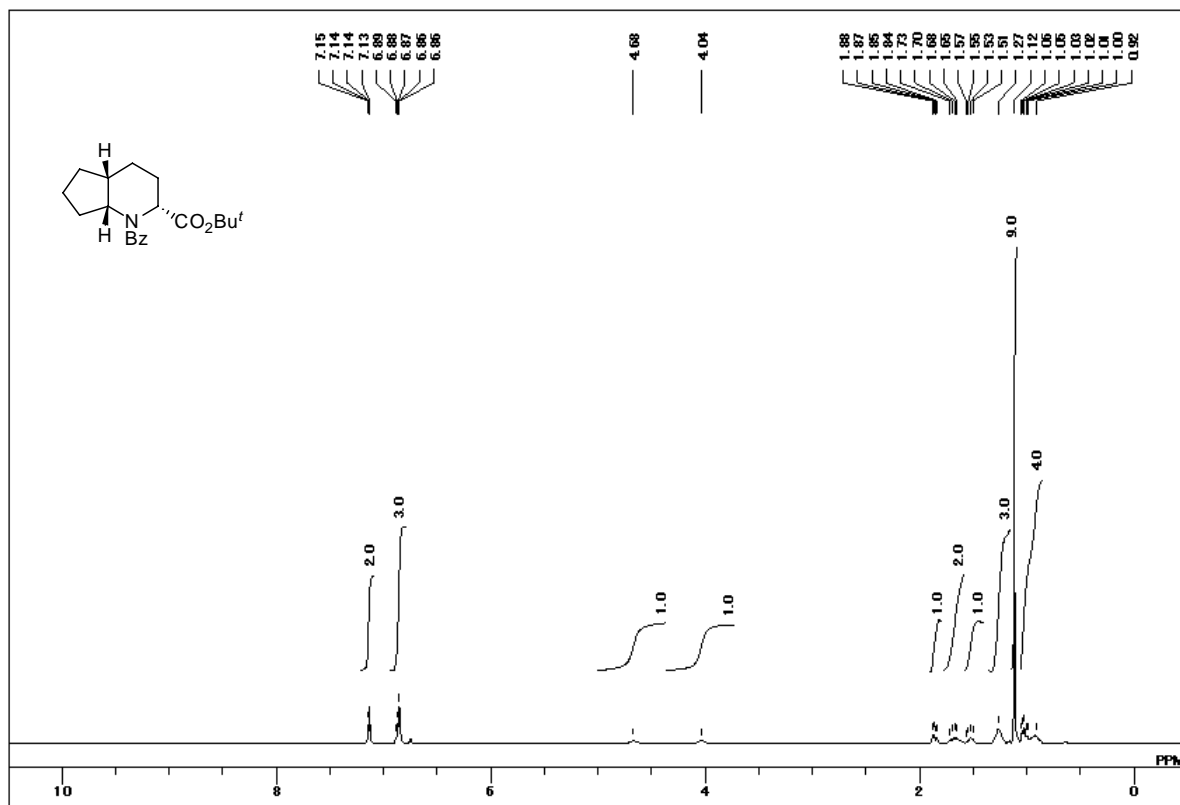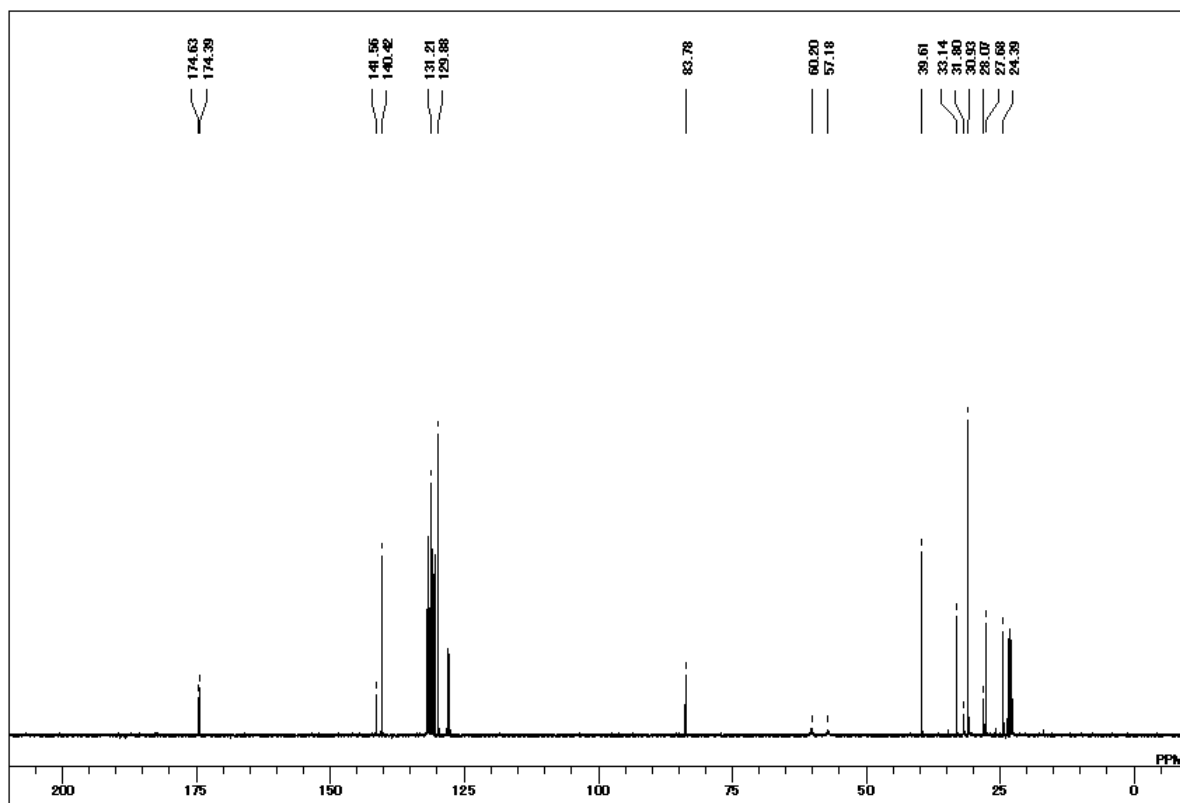

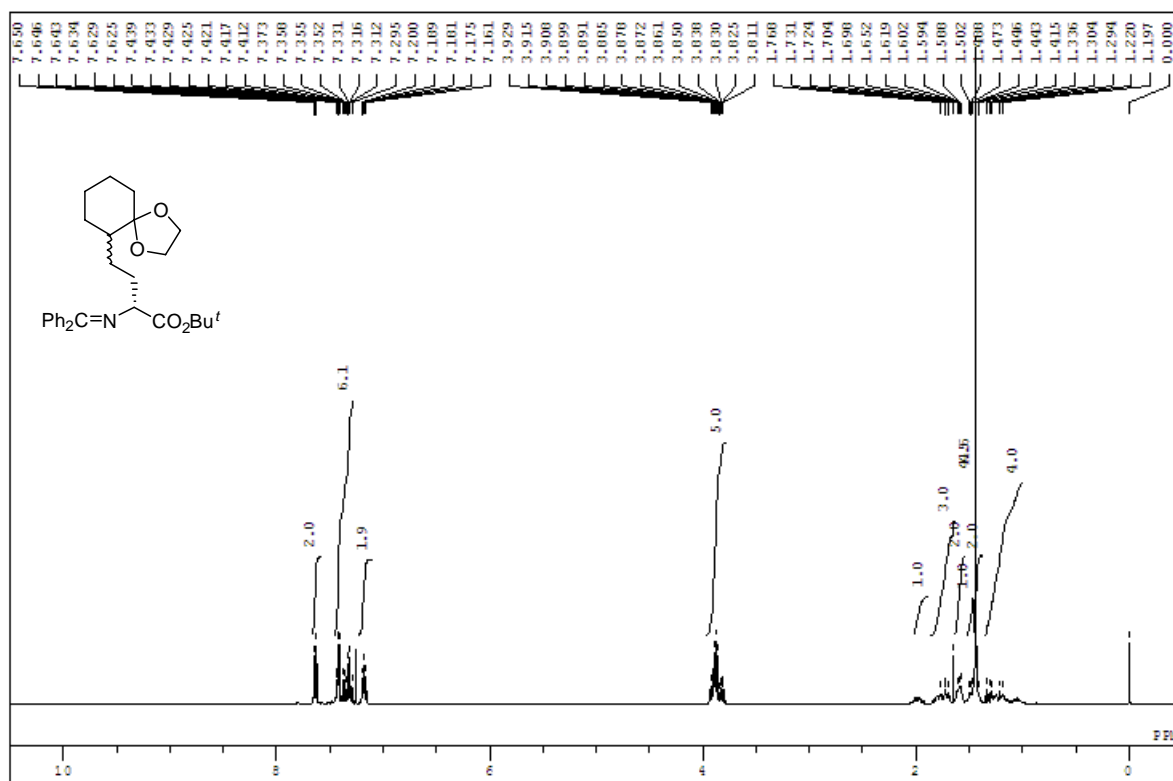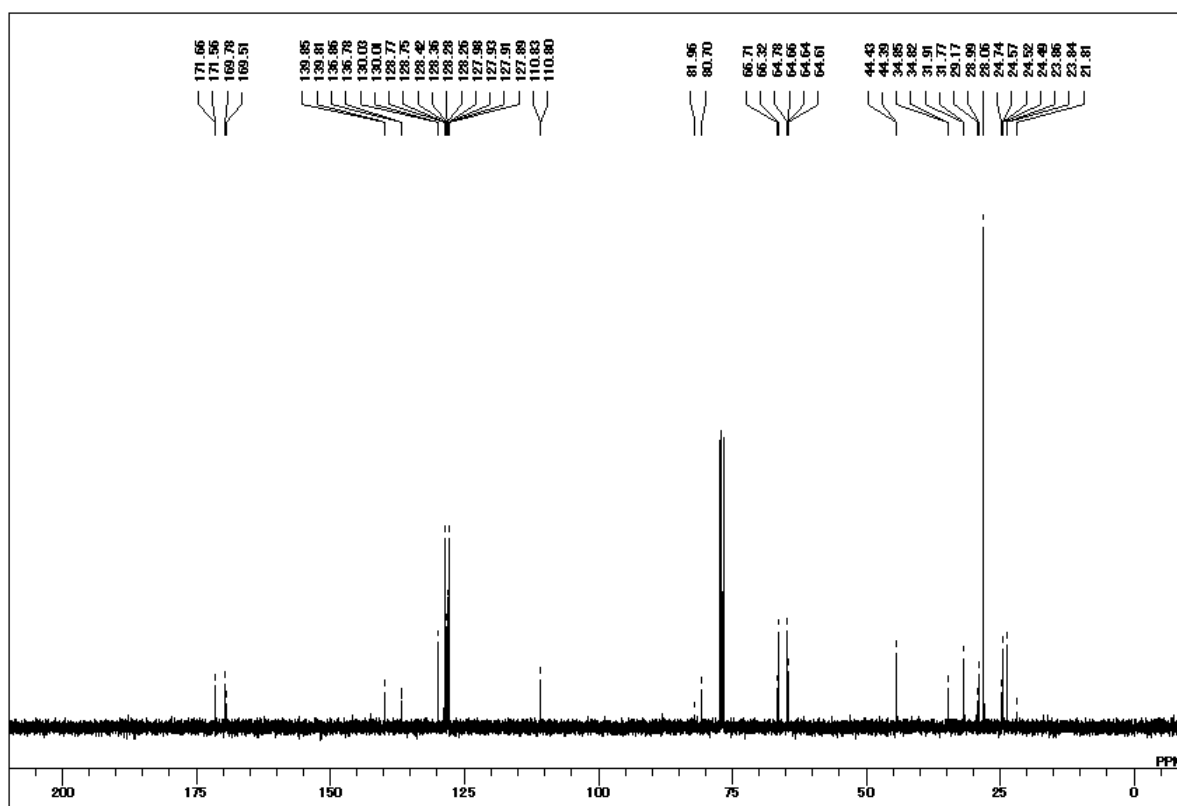

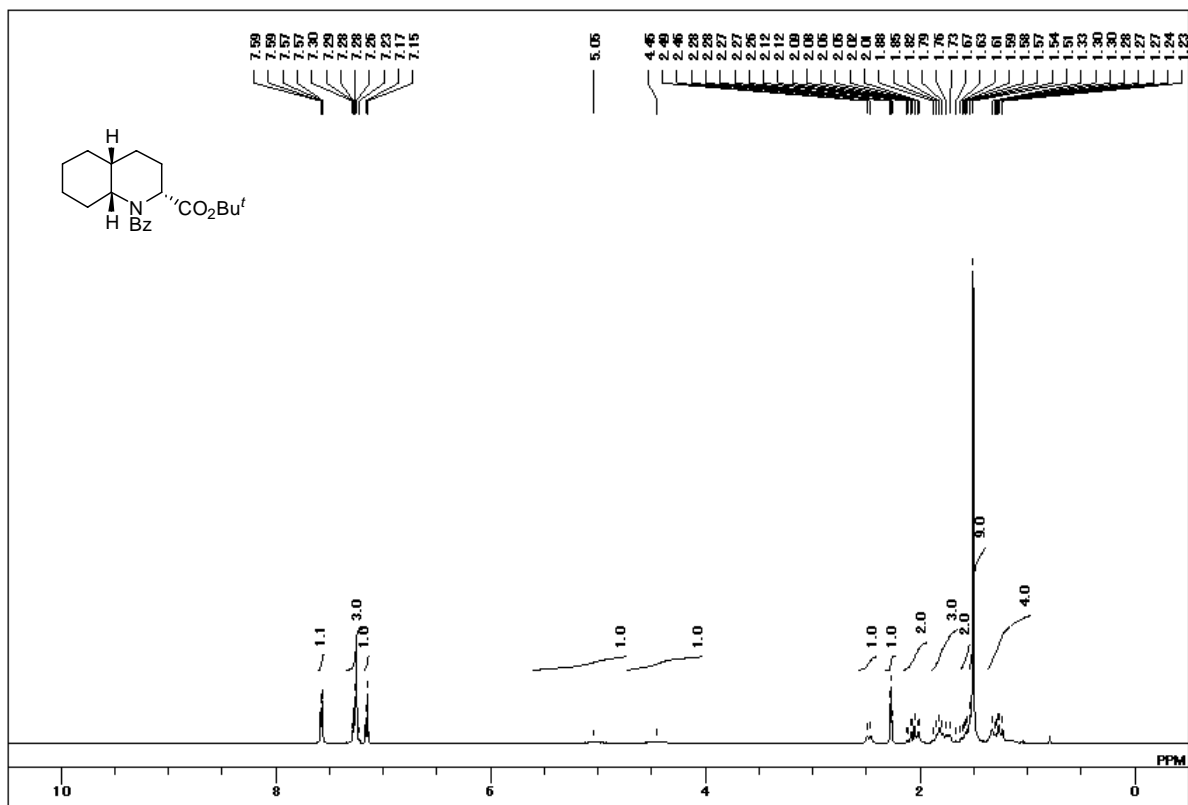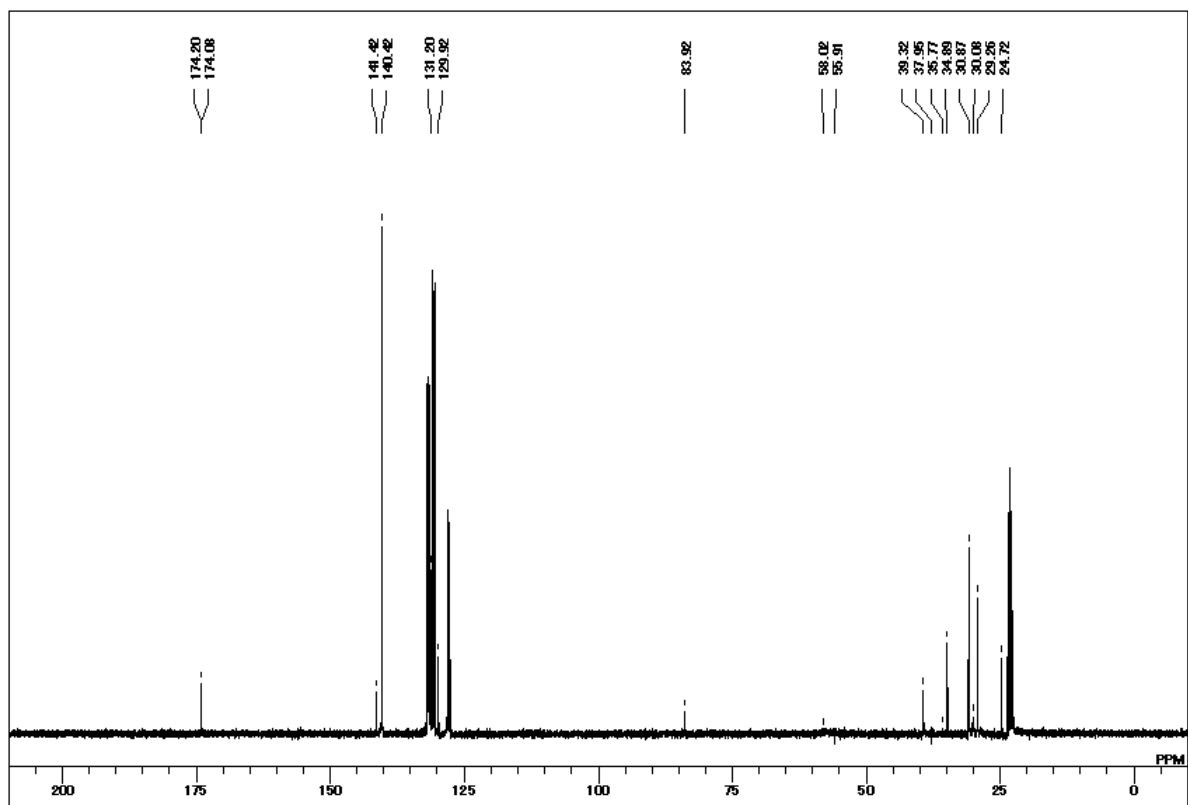

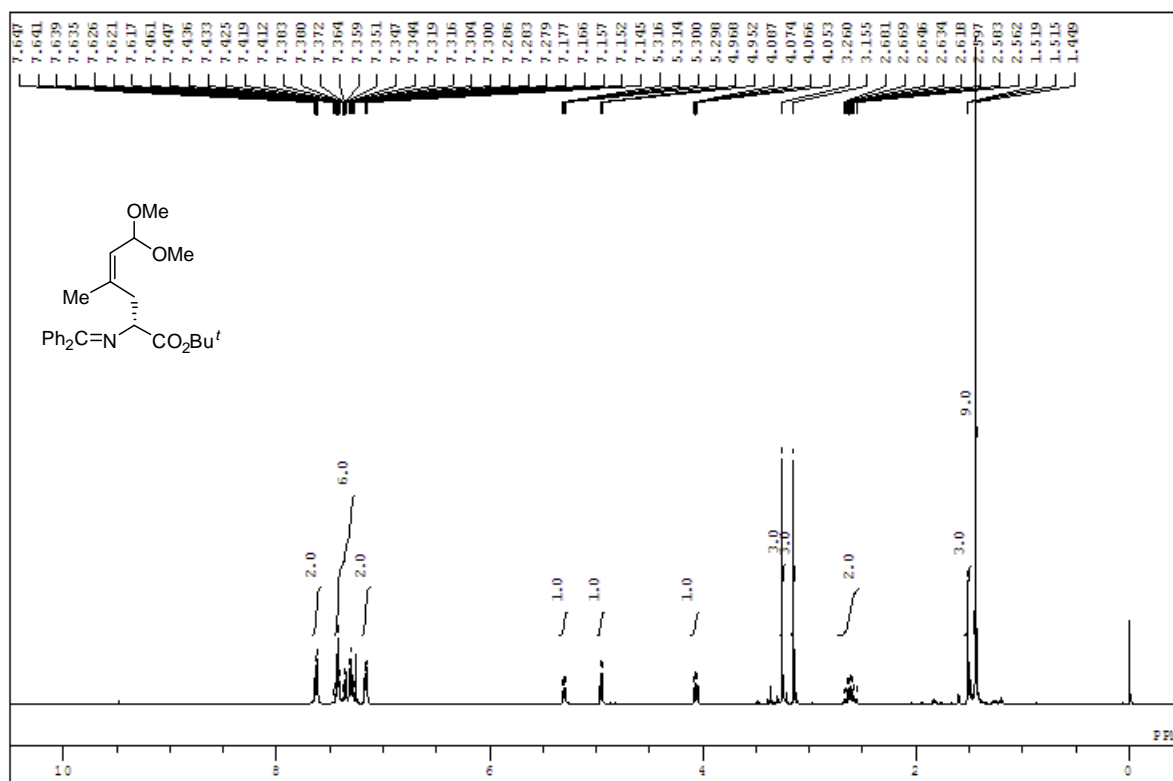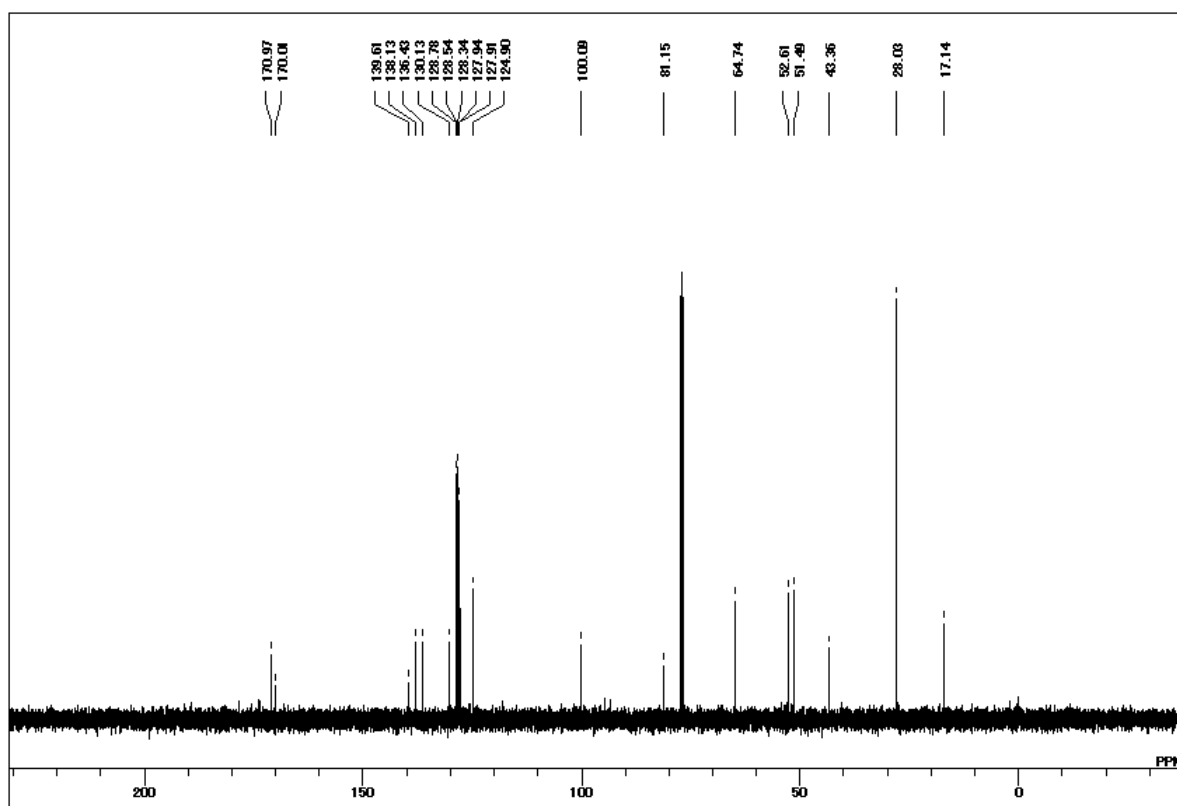

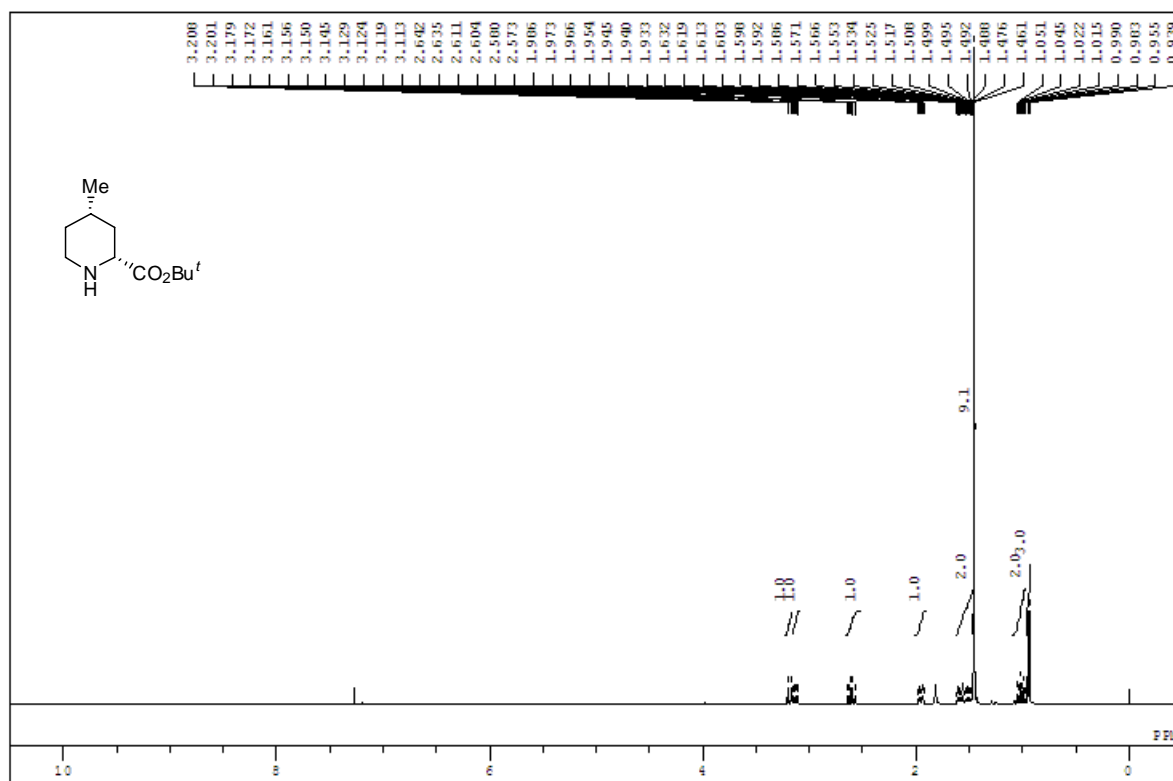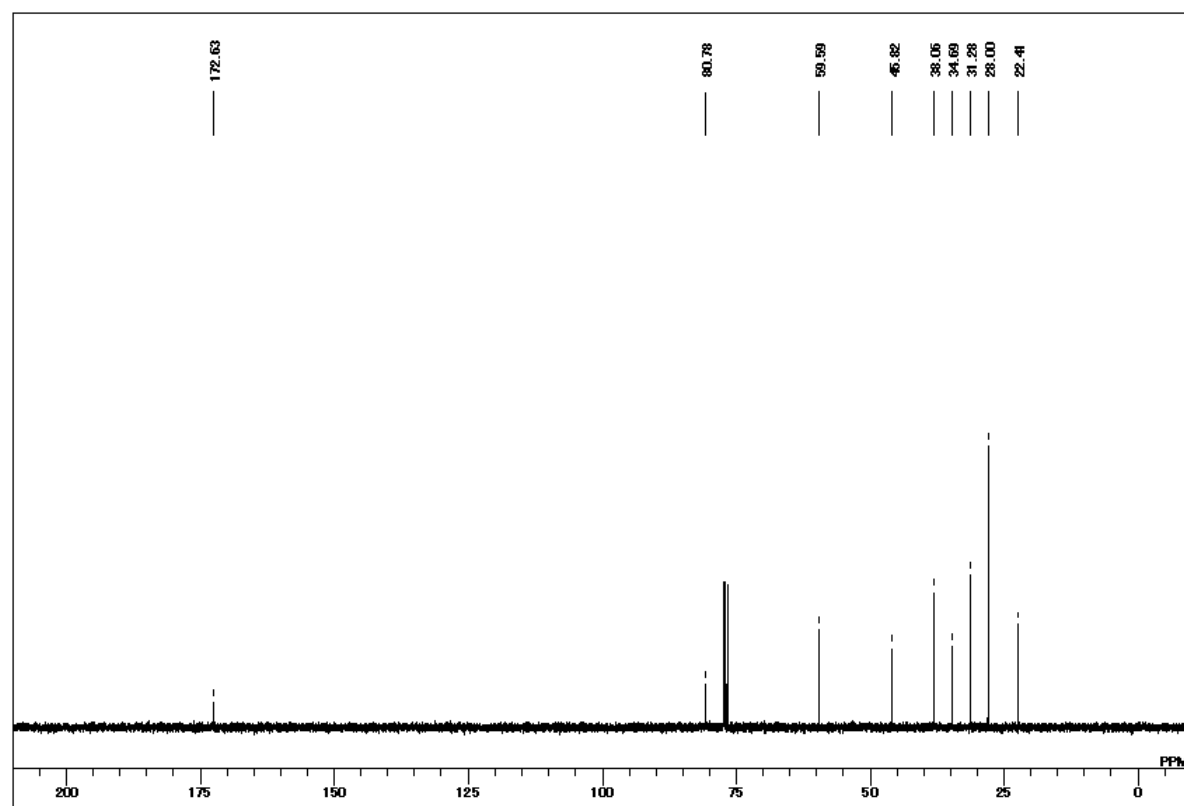

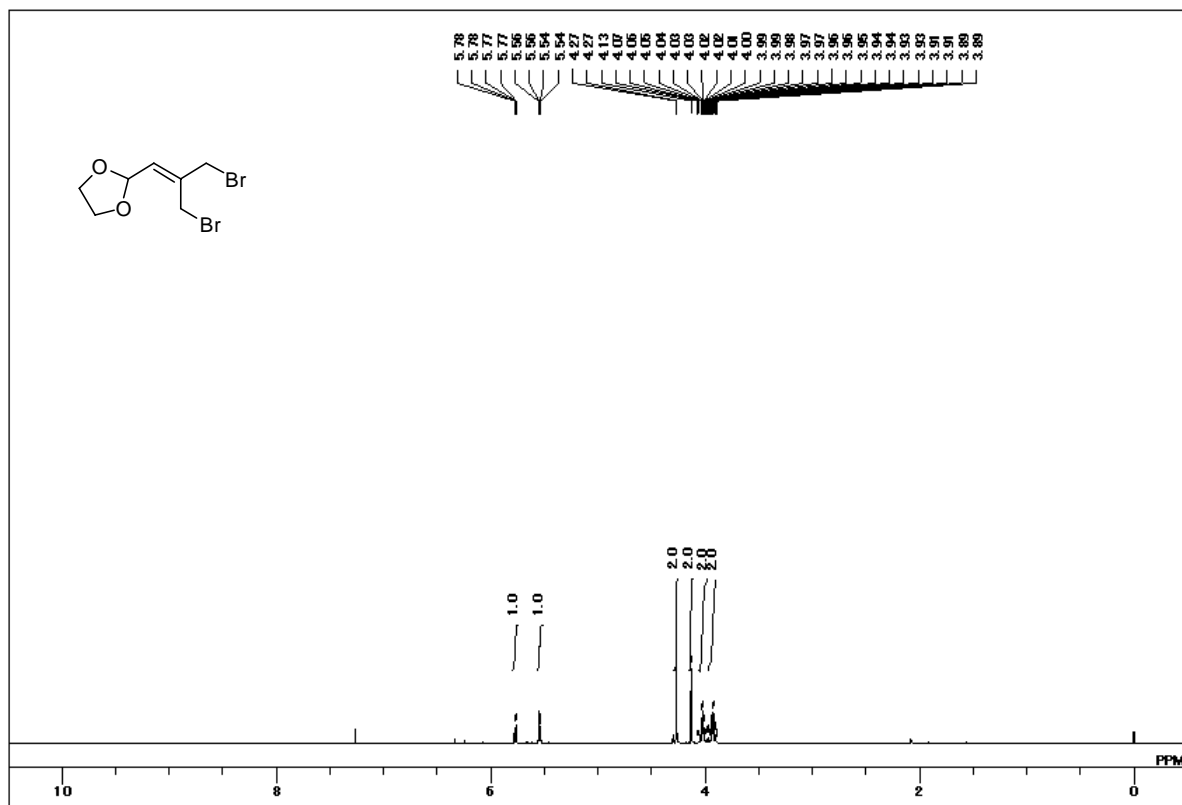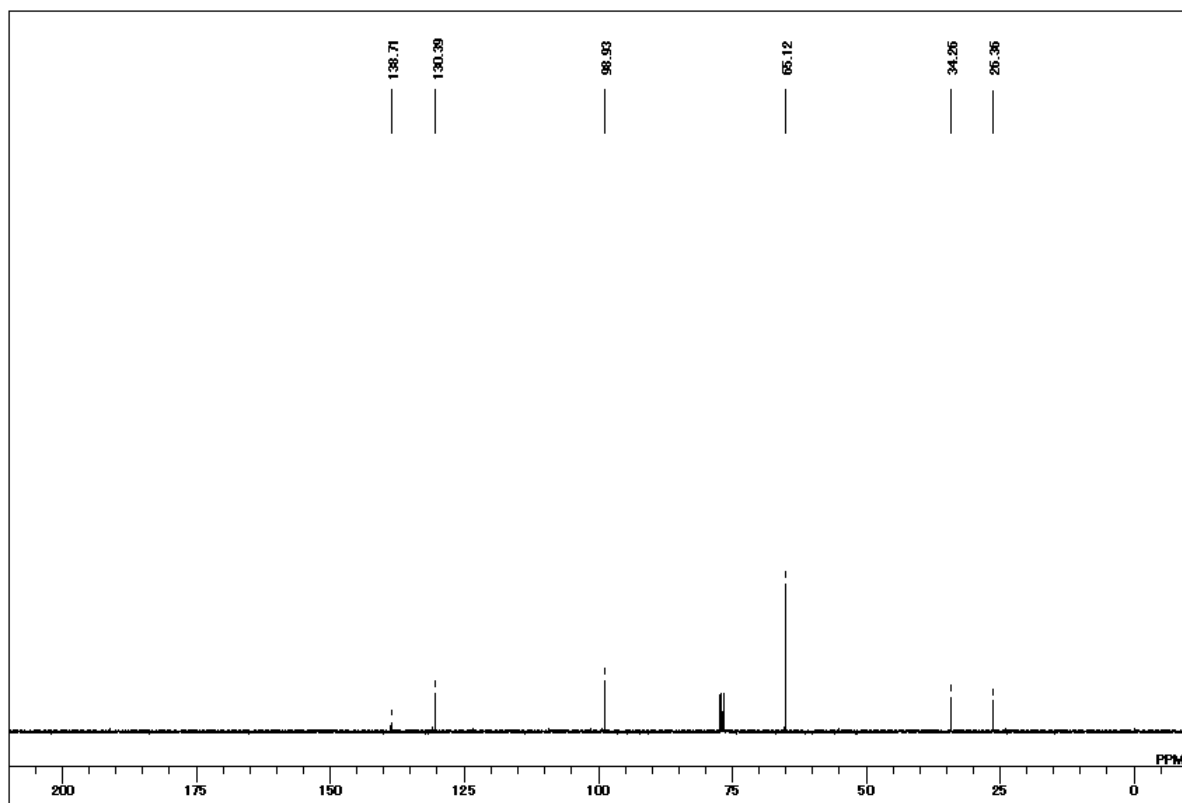

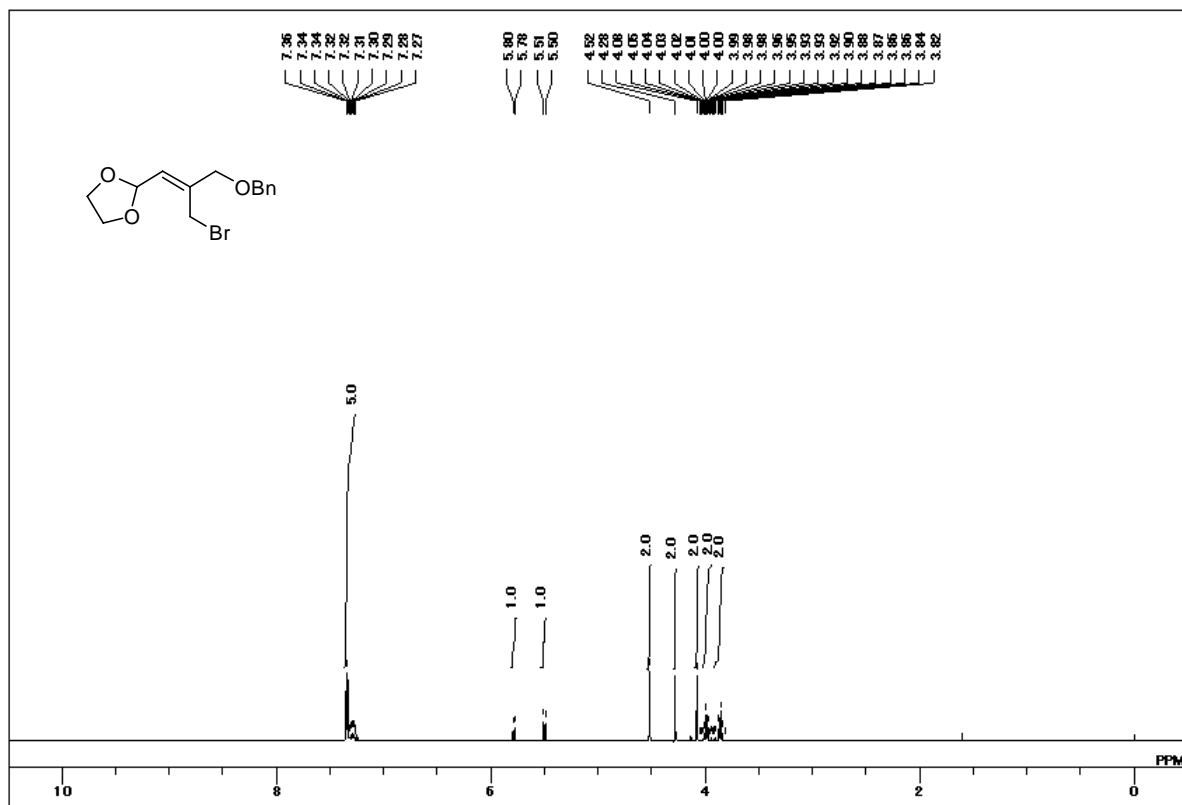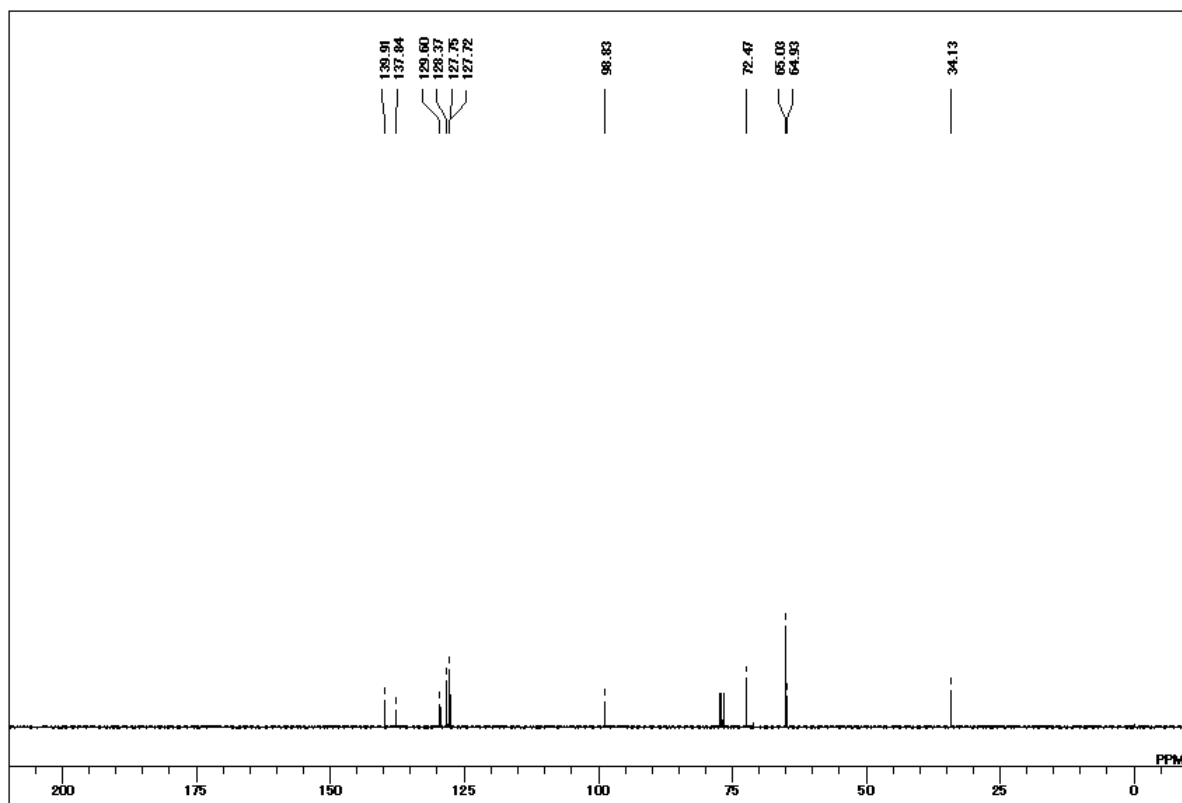



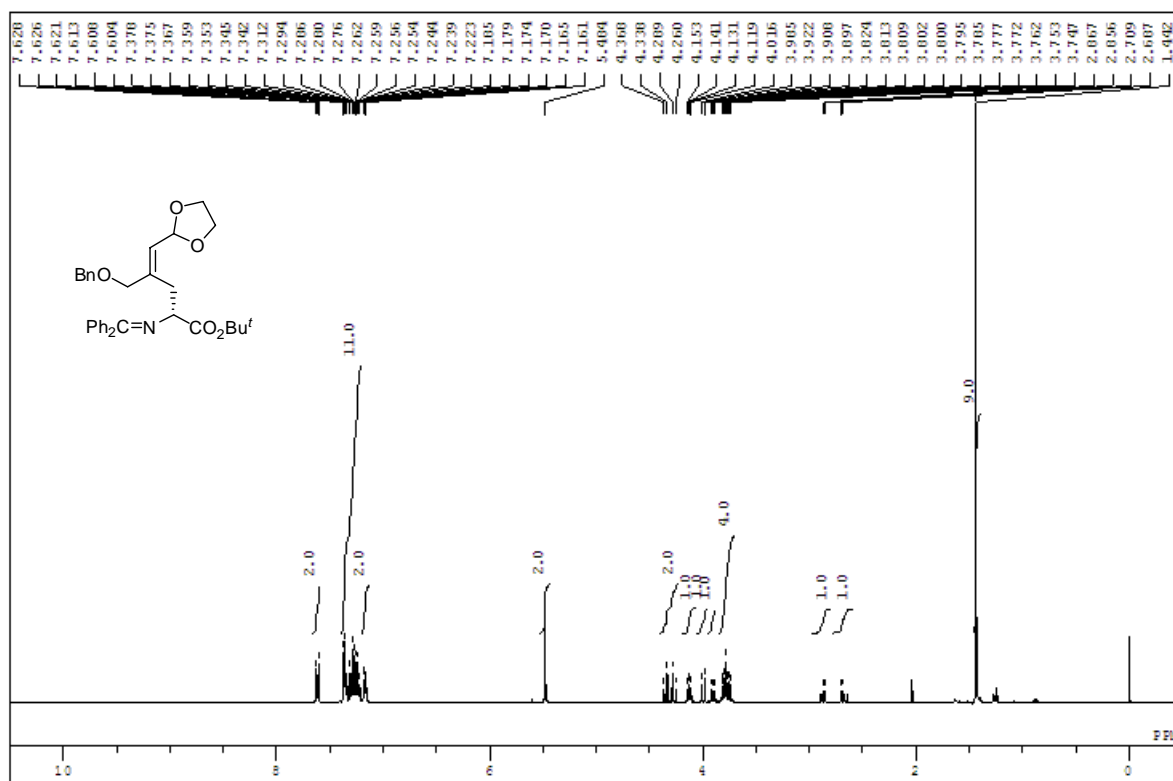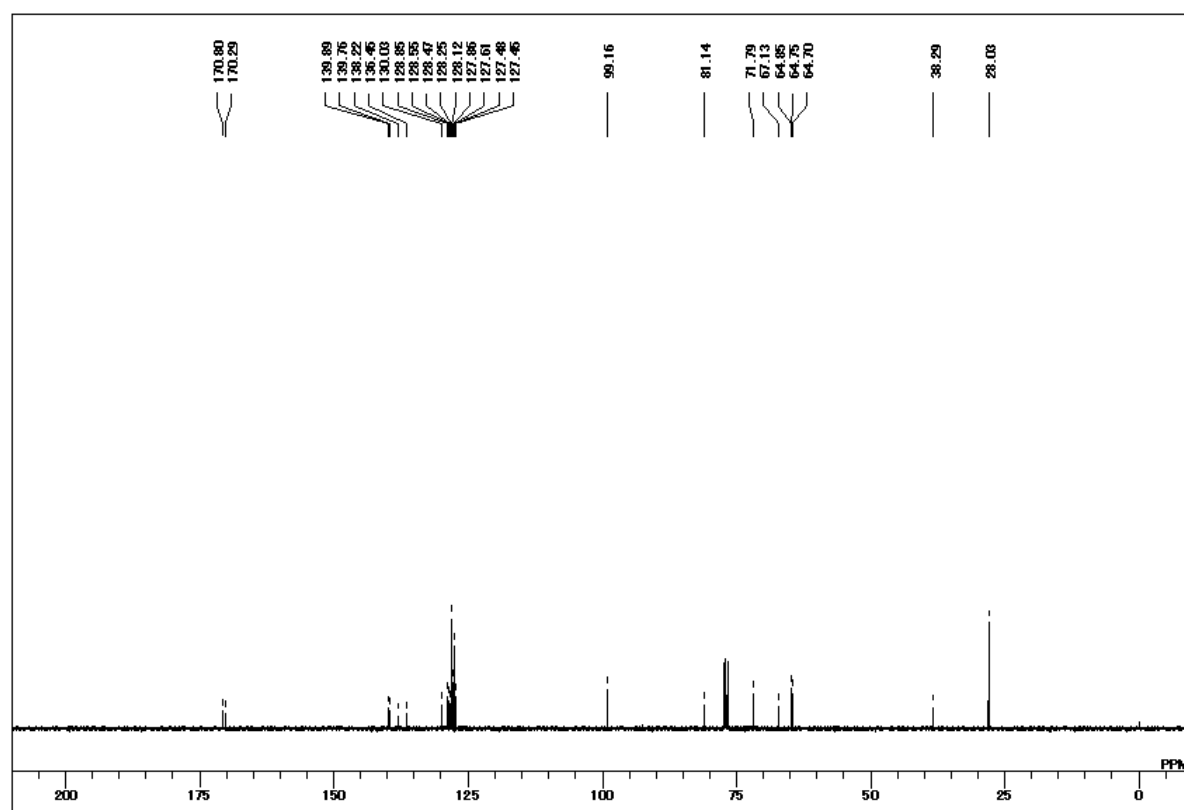

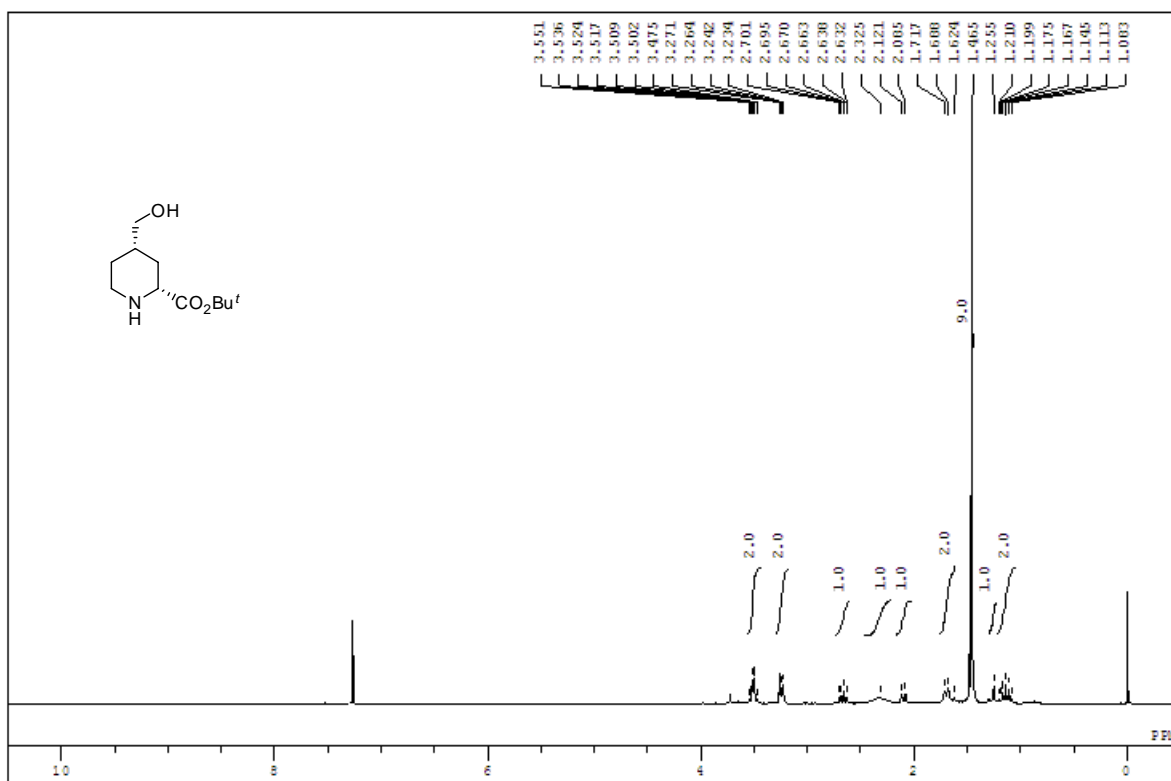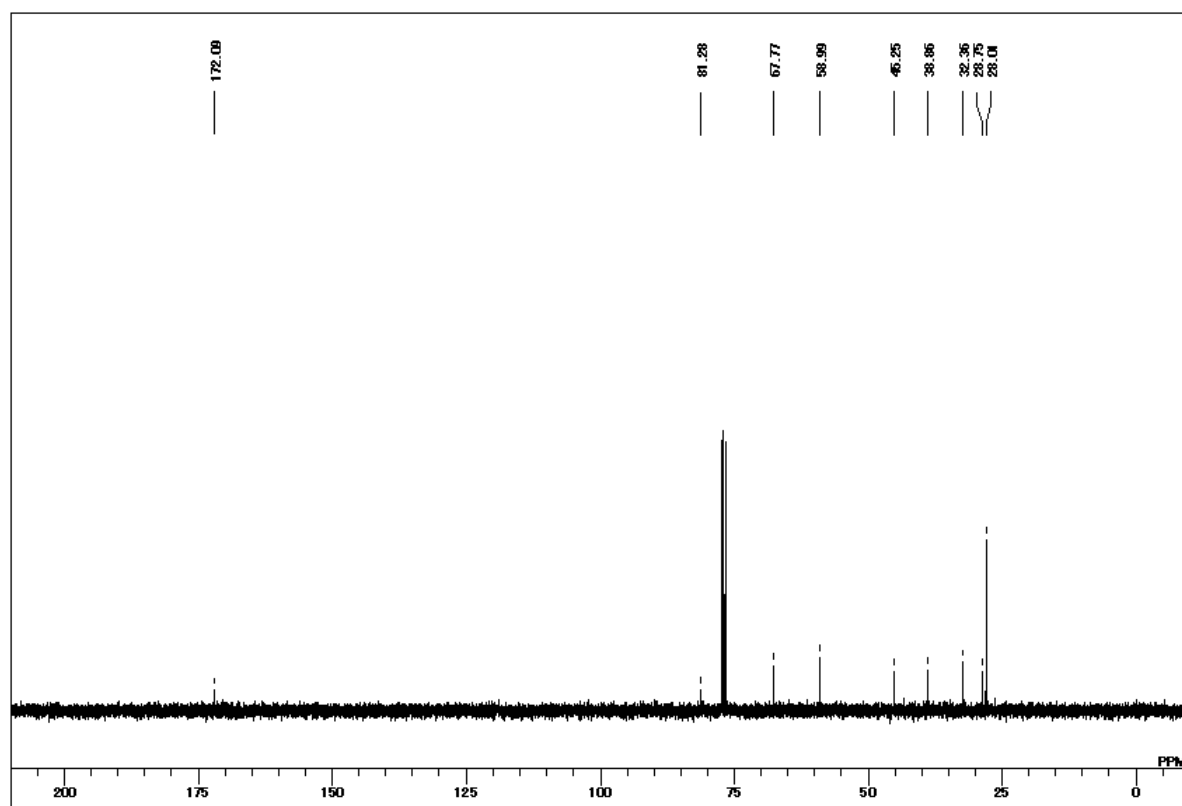

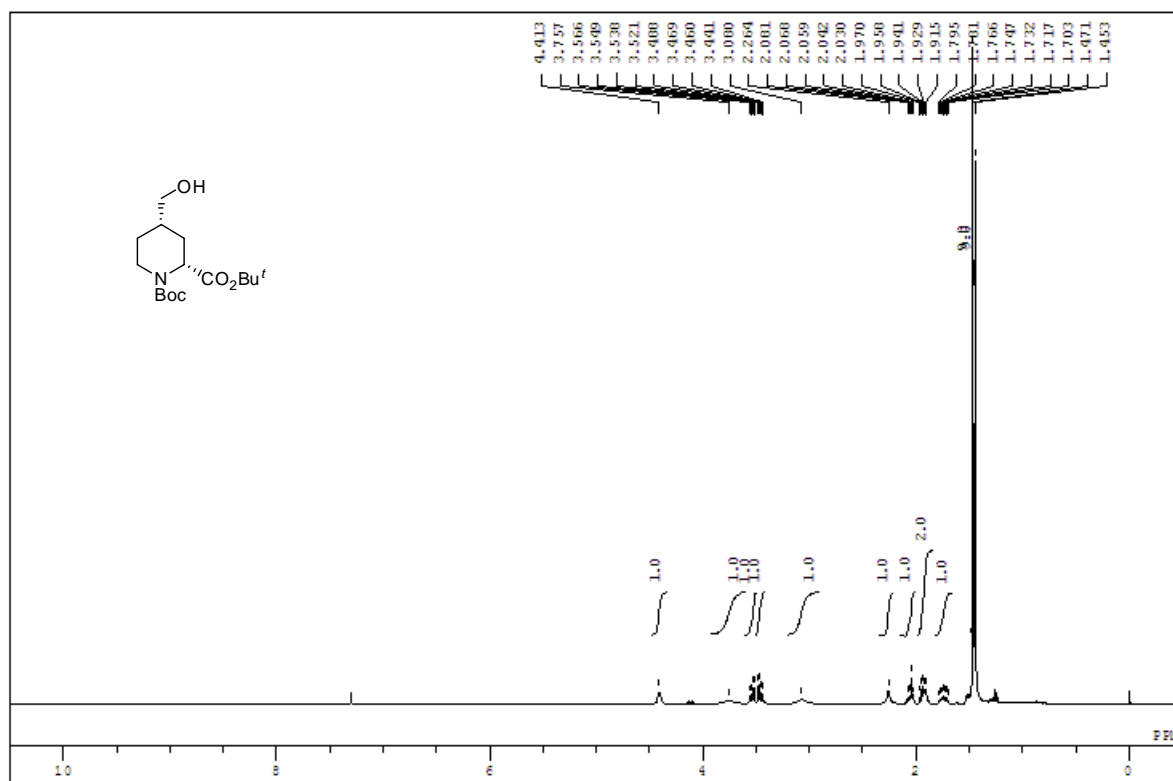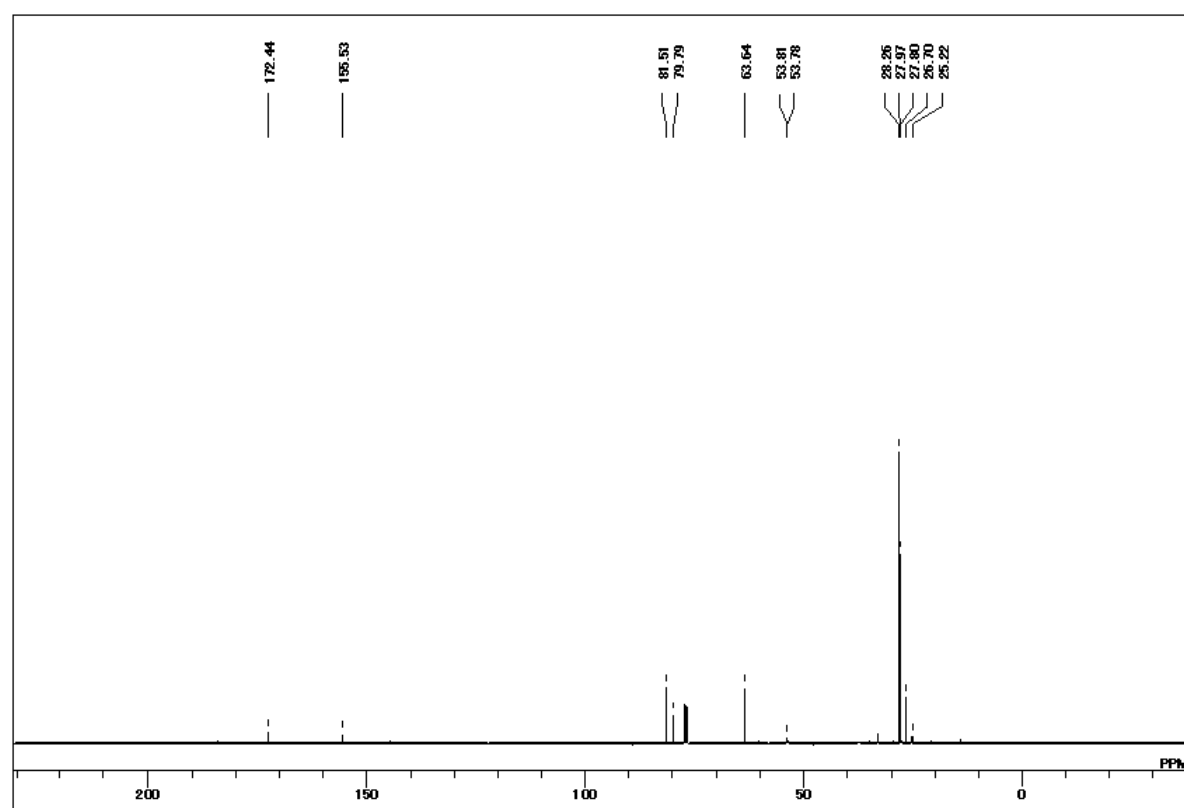

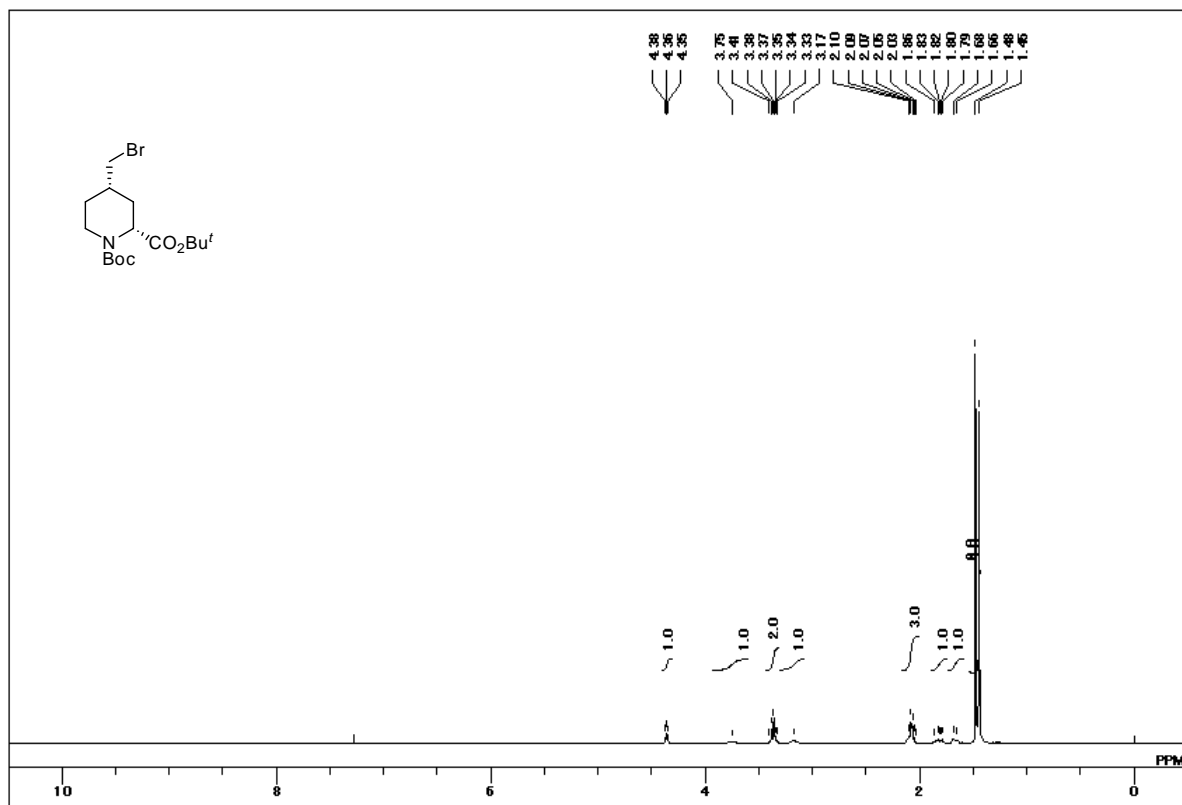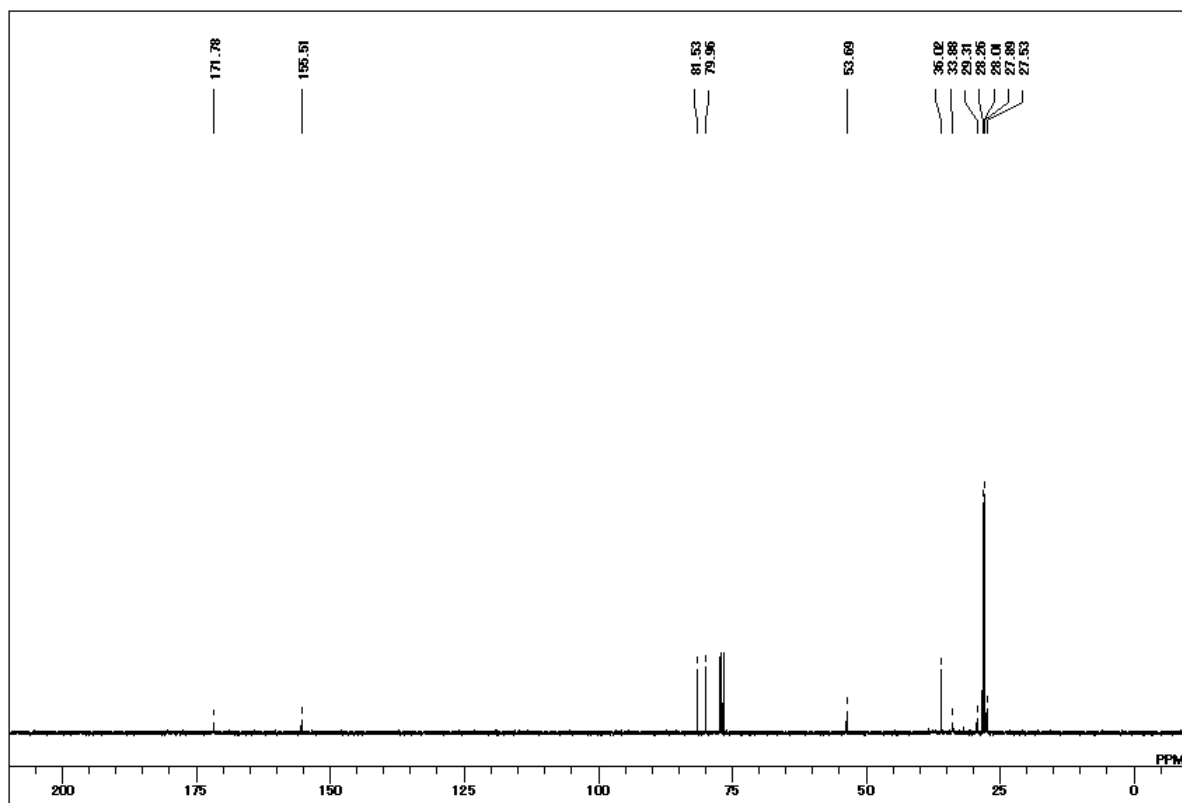

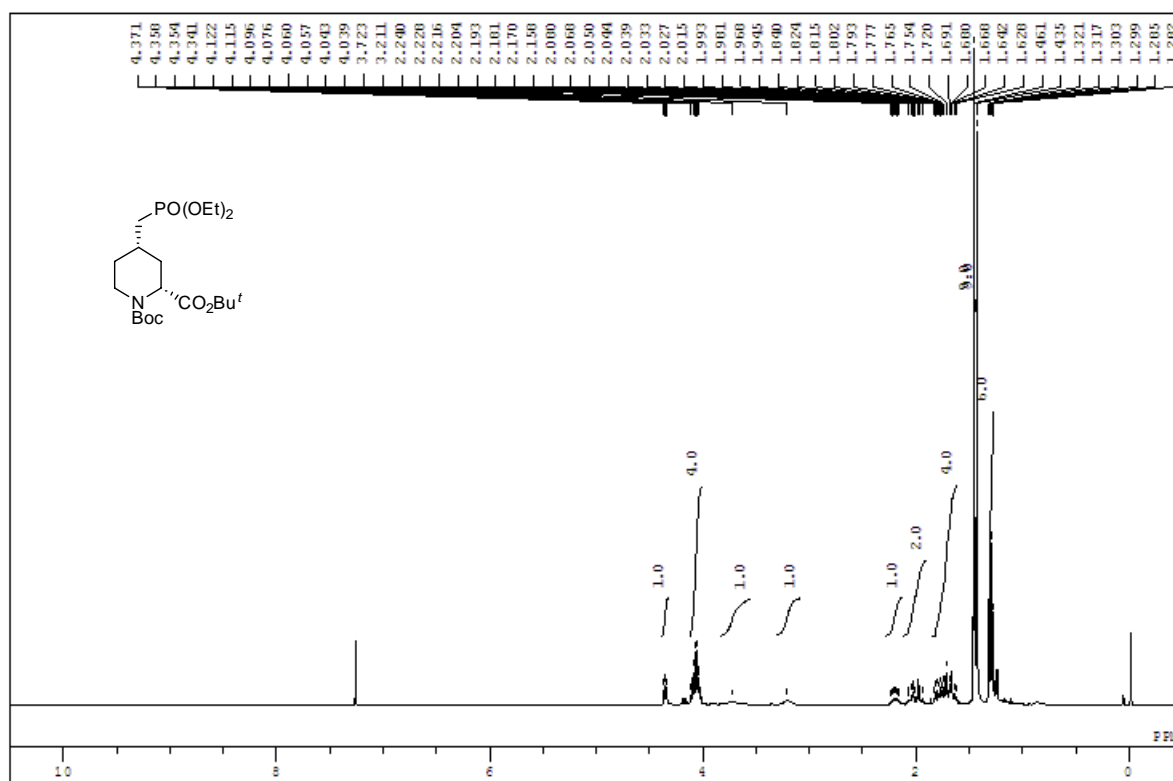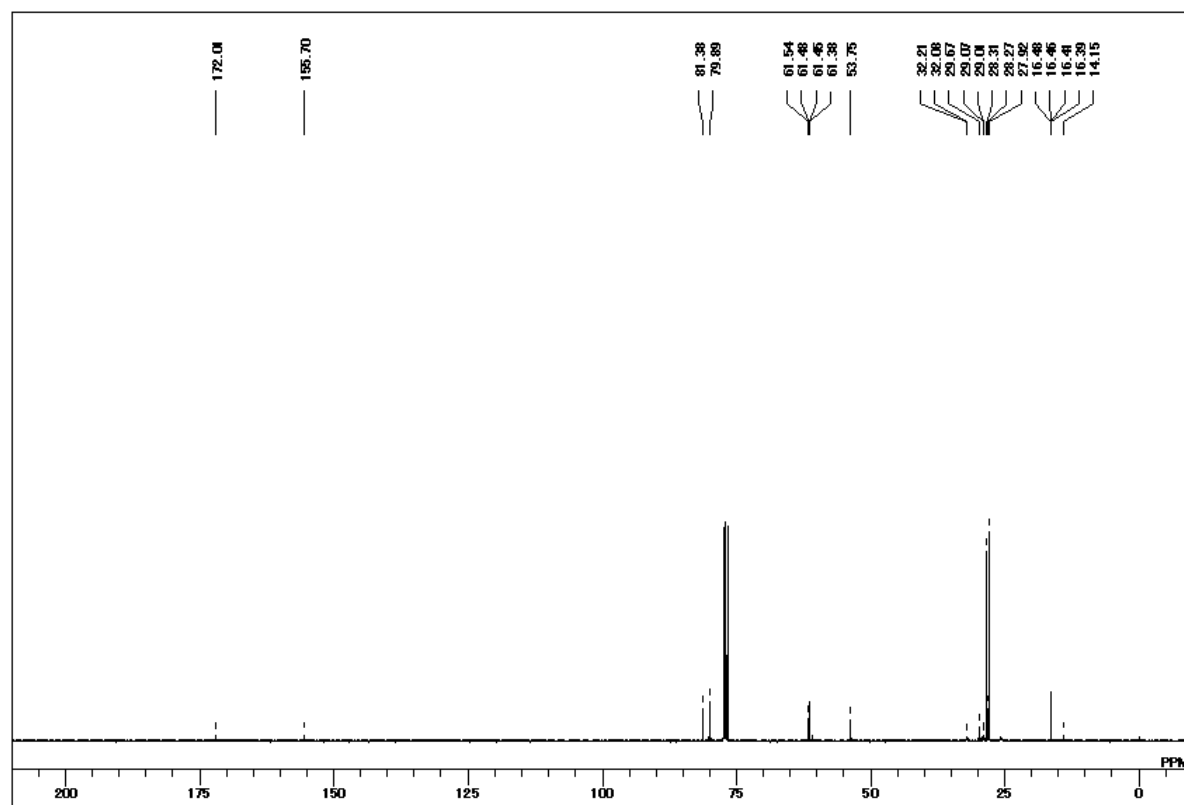

Supplement: c0sc00250j.pdf [file c0sc00250j.pdf]
